# Supplementary material for: Theoretical investigation of solvent and oxidation/deprotonation effects on the electronic structure of a mononuclear Ru-aqua-polypyridine complex in aqueous solution
Source: Royal Society of Chemistry journal article supplement (doi:10.1039/d3cp02154h), 2023-01-01
Supplement: d3cp02154h1.pdf [file d3cp02154h1.pdf]

SUPPLEMENTARY INFORMATION

Theoretical Investigation of Solvent and  
Oxidation/Deprotonation effects on the Electronic  
Structure of a Mononuclear Ru-Aqua-Polypyridine  
Complex in Aqueous Solution

Leandro Rezende Franco<sup>1,2</sup>, Kalil Cristhian Figueiredo Toledo<sup>3</sup>, Tiago Araujo Matias<sup>3</sup>,  
Carlos Moyses Araujo<sup>2,4</sup>, Koiti Araki<sup>3</sup> and Kaline Coutinho<sup>1</sup>

<sup>1</sup>Instituto de Física, Universidade de São Paulo, 05508-090, São Paulo, SP, Brazil.

<sup>2</sup>Department of Engineering and Physics, Karlstad University, 65188 Karlstad, Sweden.

<sup>3</sup>Instituto de Química, Universidade de São Paulo, 05508-000, São Paulo, SP, Brazil.

<sup>4</sup>Materials Theory Division, Department of Physics and Astronomy, Uppsala University, Box 516, 75120,  
Uppsala, Sweden.

## List of Figures

|     |                                                                                                                                                                            |    |
|-----|----------------------------------------------------------------------------------------------------------------------------------------------------------------------------|----|
| S1  | Chemical structure of the Ru-Aqua/Oxo complexes. . . . .                                                                                                                   | 5  |
| S2  | Chemical structure of $Ru^{II}(H_2O)$ and $Ru^{II}Tris(2,2' - bpy)$ . . . . .                                                                                              | 6  |
| S3  | Atomic numbering of $Ru^{II}(H_2O)$ . . . . .                                                                                                                              | 8  |
| S4  | Diagram of the N, Ru and O charges of the Ru-Aqua/Oxo complexes in vacuum and in aqueous solution. . . . .                                                                 | 9  |
| S5  | Radial distribution functions between Ru, O, and the oxygens and hydrogens of the solvent molecules for $Ru^{III}(OH)^{2+}$ and $Ru^{III}(H_2O)^{3+}$ . . . . .            | 13 |
| S6  | Distance, angle and energy distributions of the hydrogen bonds formed between the Ru-Aqua/Oxo complexes and the solvent. . . . .                                           | 14 |
| S7  | Distance, angle and energy distributions of the hydrogen bonds formed between the Ru-hydroxo complexes and the solvent. . . . .                                            | 15 |
| S8  | Frontier molecular orbitals of the Ru-Aqua/Oxo complexes. . . . .                                                                                                          | 16 |
| S9  | Theoretical UV-Vis absorption spectrum of the $Ru^{II}(H_2O)$ complex in aqueous solution, obtained with different methods. . . . .                                        | 17 |
| S10 | Comparisson of implic and explicit solvation effects on the electronic excitation energies of $Ru^{II}H_2O$ . . . . .                                                      | 19 |
| S11 | Theoretical UV-Vis absorption spectra of the Ru-Aqua complexes in vacuum and in aqueous solution. . . . .                                                                  | 20 |
| S12 | Theoretical UV-Vis absorption spectra of the Ru-hydroxo complexes in vacuum and in aqueous solution. . . . .                                                               | 21 |
| S13 | Theoretical UV-Vis absorption spectra of Ru-oxo complexes in vacuum and in aqueous solution. . . . .                                                                       | 22 |
| S14 | Detailed map of MC, MLCT, LMCT, LLCT and LC contributions in the electronic excitations of the $Ru^{II}(H_2O)$ and $Ru^{III}(H_2O)$ complexes in aqueous solution. . . . . | 27 |
| S15 | Detailed map of MC, MLCT, LMCT, LLCT and LC contributions in the electronic excitations of the $Ru^{II}(OH)$ and $Ru^{III}(OH)$ complexes in aqueous solution. . . . .     | 28 |
| S16 | Detailed map of MC, MLCT, LMCT, LLCT and LC contributions in the electronic excitations of the $Ru^{IV}(O)$ complex in aqueous solution. . . . .                           | 29 |

## List of Tables

|     |                                                                                                                                                                                                      |    |
|-----|------------------------------------------------------------------------------------------------------------------------------------------------------------------------------------------------------|----|
| S1  | Structural comparison between the B3LYP/-cc-pVDZ(PP) optimized geometry of $Ru^{II}(H_2O)$ and the crystallographic geometry of $Ru^{II}Tris(2,2' - bpy)$ . . . . .                                  | 6  |
| S2  | Structural comparison between the vacuum and solution optimized geometries of the $Ru$ -Aqua/Oxo complexes. . . . .                                                                                  | 7  |
| S3  | Atomic charges of the most relevant atoms and group of atoms of the $Ru$ -Aqua/Oxo complexes in vacuum and in aqueous solution. . . . .                                                              | 10 |
| S4  | Atomic charge variations of the $Ru$ -Aqua/Oxo complexes in solution due to oxidation and deprotonation processes. . . . .                                                                           | 10 |
| S5  | Potential energy profile of $Ru^{II}(H_2O)$ for the dissociation of $H_2O$ . . . . .                                                                                                                 | 11 |
| S6  | Binding energy profile for the dissociation of $H_2O$ from $Ru^{II}(H_2O)$ . . . . .                                                                                                                 | 12 |
| S7  | Energies of the HOMO or SOMO and LUMO orbitals of the $Ru$ -Aqua/Oxo complexes, in vacuum and in solution. . . . .                                                                                   | 12 |
| S8  | Absorption peak wavelength of the lower energy band of the $Ru^{II}(H_2O)$ complex in aqueous solution, using the B3LYP functional and several sets of basis set. . . . .                            | 18 |
| S9  | Wavelength and intensity of the first 50 electronic excitations of the $Ru$ -Aqua/Oxo complexes in the oxidation state $II$ . . . . .                                                                | 23 |
| S10 | Wavelength and intensity of the first 50 electronic excitations of the $Ru$ -Aqua/Oxo complexes in the oxidation state $III$ . . . . .                                                               | 24 |
| S11 | Wavelength and intensity of the first 50 electronic excitations of the $Ru$ -Aqua/Oxo complexes in the oxidation state $IV$ . . . . .                                                                | 25 |
| S12 | Wavelength of the UV-Vis absorption peaks of the $Ru$ -Aqua/Oxo complexes in vacuum and in aqueous solution, using different approaches for the solute-solvent interaction (PCM, PC, HB+PC). . . . . | 26 |
| S13 | Percentage of MC, MLCT, LMCT, LC and LLCT contributions for electronic excitation groups (1-30 and 31-50). . . . .                                                                                   | 26 |

# 1 Supplementary Information

## 1.1 Experimental

The cis-[Ru(H<sub>2</sub>O)(py)(bpy)<sub>2</sub>](NO<sub>3</sub>)<sub>2</sub> complex was prepared by dispersing 1 g of cis-[Ru(bpy)<sub>2</sub>Cl<sub>2</sub>] (Sigma-Aldrich) in 50 ml of 1:1 v/v water/ethanol mixture, reacting with 1.0 equivalent of AgNO<sub>3</sub> (0.35 g) at 70-80 °C, and filtering off the AgCl precipitate using a Celite™ bed. Then, 1.0 equivalent of pyridine (0.164 g) was reacted with the filtrate solution for 1 hr under reflux to generate the cis-[RuCl(py)(bpy)<sub>2</sub>](NO<sub>3</sub>) complex, and 1.0 equivalent of AgNO<sub>3</sub> (0.350 g) added into and reacted for 30 min at 70-80 °C. The white-grey AgCl precipitate was filtered out from the desired cis-[Ru(H<sub>2</sub>O)(py)(bpy)<sub>2</sub>](NO<sub>3</sub>)<sub>2</sub> complex bright orange solution, which was concentrated in a flash evaporator, and kept in a refrigerator for 3 hrs. The precipitate was filtered out, washed with a minimum amount of cold acetone, and kept in a desiccator under vacuum. Elemental analysis for (RuC<sub>25</sub>H<sub>23</sub>N<sub>7</sub>O<sub>7</sub>)H<sub>2</sub>O, exp.(calc.): C= 46.27 (46.01), H= 3.81 (3.86), N= 14.93 (15.02), ESI-MS: molecular peak at m/z 510.20 [Ru(OH)(py)(bpy)<sub>2</sub>]<sup>+</sup>. The complex and the oxidized RuIII aqua/hydroxo and the RuIVO species were generated in situ by reaction with suitable amounts of cerium(IV) ammonium nitrate (CAN). The solution of cis-[RuII(H<sub>2</sub>O)(py)(bpy)<sub>2</sub>](NO<sub>3</sub>)<sub>2</sub> used to register the UV-Vis absorption spectrum was prepared by dissolving 3.50 mg of complex in 100 mL of 0.1 mol L<sup>-1</sup> HNO<sub>3</sub> solution, pH = 1. Another solution was prepared by dissolving 3.50 mg of cis-[Ru(H<sub>2</sub>O)(py)(bpy)<sub>2</sub>](NO<sub>3</sub>)<sub>2</sub> in 100 mL of 0.1 mol L<sup>-1</sup> of aqueous HNO<sub>3</sub>, pH=1, and the first solution was carefully added (volume corresponding to 2.90 mg of CAN) into the stirred RuII complex solution. Considering that the pK<sub>a</sub> of coordinated water molecule is 0.85, it must contain 40.2 mol L<sup>-1</sup> of cis-[RuIII(OH)(py)(bpy)<sub>2</sub>]<sup>2+</sup> and 13.4 mol L<sup>-1</sup> of cis-[RuIII(H<sub>2</sub>O)(py)(bpy)<sub>2</sub>]<sup>3+</sup>. The RuIVO species was generated by reacting the RuII complex as above but using double of the volume of CAN solution (5.80 mg of CAN). The UV-Vis absorption spectra were obtained in a Hewlett Packard 8453A diode array spectrophotometer using a quartz cuvette with a path length of 10.0 mm, at 25 °C.

## 1.2 Figures and Tables

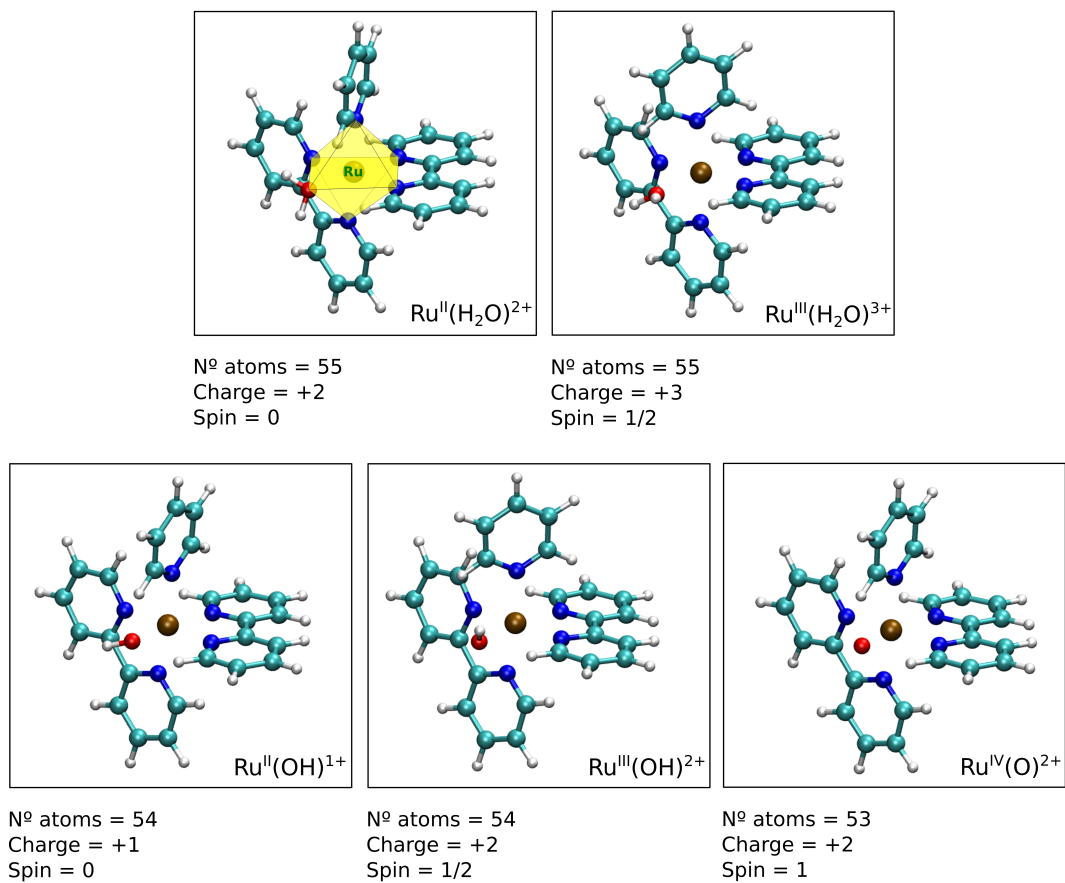

Figure S1: Chemical structure of the Ru-Aqua/Oxo complexes.

Table S1: Structural comparison between the B3LYP/(aug)-cc-pVDZ(PP-*Ru*) optimized geometry of  $Ru^{II}(H_2O)$  and the crystallographic geometry of  $Ru^{II}Tris(2,2'-bpy)$  [1]. Distances ( $r$ ) in Å and angles ( $a$ ) in degree. The parameter  $|\Delta|$  represents the module of the difference between the theoretical and experimental values.

| par                       | $Ru^{II}(H_2O)$ | $Ru^{II}Tris(2,2'-bpy)$ | $ \Delta $ |
|---------------------------|-----------------|-------------------------|------------|
| $r(Ru - N_{11})$          | 2.043           | 2.056(3)                | 0.013      |
| $r(Ru - N_3)$             | 2.084           | 2.056(3)                | 0.028      |
| $r(Ru - N_{19})$          | 2.107           | 2.059(3)                | 0.048      |
| $r(Ru - O)$               | 2.242           | 2.059(3)*               | 0.183      |
| $r(Ru - N_{25})$          | 2.088           | 2.060(3)                | 0.028      |
| $r(Ru - N_{45})$          | 2.149           | 2.060(3)*               | 0.089      |
| $a(N_{11} - Ru - N_3)$    | 78.9            | 78.7(2)                 | 0.2        |
| $a(N_{11} - Ru - N_{19})$ | 99.1            | 97.9(1)                 | 1.2        |
| $a(N_{11} - Ru - O)$      | 174.2           | 172.6(1)*               | 1.6        |
| $a(N_{11} - Ru - N_{25})$ | 90.4            | 92.0(1)                 | 1.6        |
| $a(N_3 - Ru - N_{25})$    | 97.8            | 94.9(1)                 | 2.9        |
| $a(N_{19} - Ru - N_{25})$ | 78.1            | 78.5(1)                 | 0.4        |
| $a(O - Ru - N_{19})$      | 86.5            | 86.3(1)                 | 0.2        |
| $a(N_{19} - Ru - N_{45})$ | 97.5            | 94.8(1)*                | 2.7        |
| $a(N_{25} - Ru - N_{45})$ | 175.4           | 171.0(1)*               | 4.4        |

(\*) Non identical atoms.

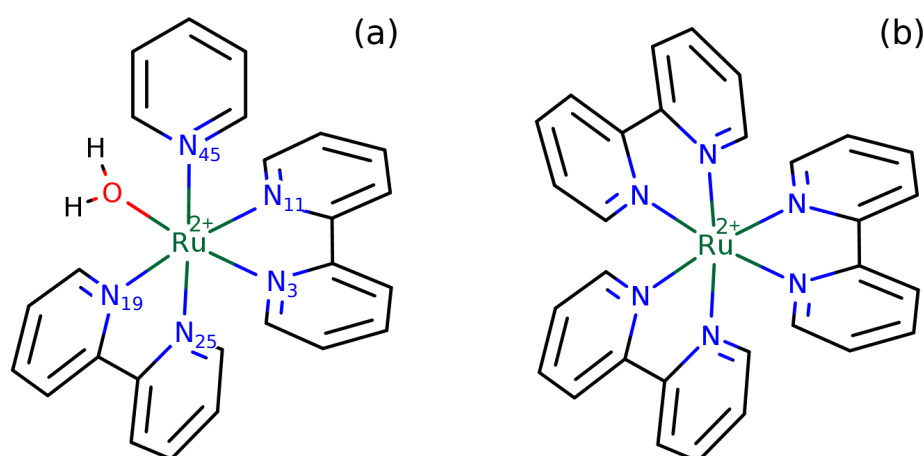

Figure S2: Molecular structure of  $Ru^{II}(H_2O)$  (a) and  $Ru^{II}Tris(2,2'-bpy)$  (b).

Table S2: Structural comparison between the vacuum (VAC) and solution (SOL) optimized geometries of the *Ru*-Aqua/Oxo complexes, using the B3LYP(aug)-cc-pVDZ(PP-*Ru*) approach and the continuous PCM model to address the solvent effects. Distances ( $r$ ) in Å, angles ( $\alpha$ ) and dihedrals ( $d$ ) in degrees. The parameter  $\Delta$  represents the difference between the geometric (par) parameters of the optimized geometries in vacuum and in solution, ie  $\Delta = par^{SOL} - par^{VAC}$ . At the bottom of the table there is a legend for all the geometric parameters shown. The numbers of atoms follow the numbering shown in the figure S3.

| par   | $Ru^{II}(H_2O)$ |       |          | $Ru^{III}(H_2O)$ |        |          | $Ru^{II}(OH)$ |        |          | $Ru^{III}(OH)$ |        |          | $Ru^{IV}(O)$ |        |          |
|-------|-----------------|-------|----------|------------------|--------|----------|---------------|--------|----------|----------------|--------|----------|--------------|--------|----------|
|       | VAC             | SOL   | $\Delta$ | VAC              | SOL    | $\Delta$ | VAC           | SOL    | $\Delta$ | VAC            | SOL    | $\Delta$ | VAC          | SOL    | $\Delta$ |
| $r_1$ | 2.242           | 2.214 | -0.03    | 2.173            | 2.148  | -0.03    | 2.044         | 2.074  | 0.03     | 1.930          | 1.944  | 0.01     | 1.762        | 1.768  | 0.01     |
| $r_2$ | 0.968           | 0.968 | 0.00     | 0.970            | 0.970  | 0.00     | 0.964         | 0.965  | 0.00     | 0.968          | 0.968  | 0.00     |              |        |          |
| $r_3$ | 0.969           | 0.969 | 0.00     | 0.971            | 0.971  |          |               |        |          |                |        |          |              |        |          |
| $r_4$ | 2.150           | 2.143 | -0.01    | 2.156            | 2.140  | -0.02    | 2.162         | 2.152  | -0.01    | 2.152          | 2.147  | -0.01    | 2.163        | 2.159  | 0.00     |
| $r_5$ | 2.043           | 2.043 | 0.00     | 2.061            | 2.038  | -0.02    | 2.081         | 2.077  | 0.00     | 2.133          | 2.124  | -0.01    | 2.211        | 2.198  | -0.01    |
| $r_6$ | 2.107           | 2.099 | -0.01    | 2.134            | 2.106  | -0.03    | 2.071         | 2.077  | 0.01     | 2.094          | 2.089  | 0.00     | 2.103        | 2.100  | 0.00     |
| $r_7$ | 2.088           | 2.081 | -0.01    | 2.112            | 2.084  | -0.03    | 2.058         | 2.060  | 0.00     | 2.089          | 2.084  | -0.01    | 2.105        | 2.098  | -0.01    |
| $r_8$ | 2.084           | 2.077 | -0.01    | 2.119            | 2.088  | -0.03    | 2.067         | 2.067  | 0.00     | 2.109          | 2.107  | 0.00     | 2.108        | 2.106  | 0.00     |
| $a_1$ | 86.5            | 86.6  | 0.1      | 84.5             | 84.4   | -0.1     | 91.1          | 89.6   | -1.5     | 89.7           | 89.5   | -0.3     | 92.4         | 92.6   | 0.2      |
| $a_2$ | 89.3            | 89.7  | 0.4      | 87.4             | 89.0   | 1.6      | 89.4          | 89.5   | 0.0      | 83.8           | 85.0   | 1.2      | 90.8         | 91.7   | 0.9      |
| $a_3$ | 105.5           | 105.1 | -0.4     | 111.1            | 105.9  | -5.2     |               |        |          |                |        |          |              |        |          |
| $a_4$ | 115.7           | 114.7 | -1.0     | 127.8            | 120.3  | -7.5     | 114.9         | 111.0  | -4.0     | 115.7          | 114.2  | -1.6     |              |        |          |
| $d_1$ | 179.6           | 179.0 | -0.6     | 177.8            | 176.2  | -1.6     | 178.6         | 178.7  | 0.1      | 178.1          | 177.7  | -0.4     | 177.7        | 176.8  | -0.9     |
| $d_2$ | 177.5           | 178.0 | 0.5      | 180.0            | 180.0  | 0.0      | 176.7         | 177.2  | 0.5      | 180.0          | 179.8  | -0.2     | 177.7        | 177.4  | -0.3     |
| $d_3$ | 178.2           | 178.4 | 0.2      | 179.0            | 178.3  | -0.8     | 176.6         | 177.0  | 0.4      | 176.1          | 177.4  | 1.3      | 176.7        | 178.1  | 1.4      |
| $d_4$ | 178.8           | 179.0 | 0.2      | -177.4           | -177.7 | -0.3     | -177.0        | -178.2 | -1.2     | -172.7         | -174.9 | -2.2     | -176.6       | -179.8 | -3.2     |
| $d_5$ | 179.6           | 179.3 | -0.2     | 178.7            | 179.3  | 0.6      | 179.0         | 178.1  | -0.9     | 178.0          | 178.7  | 0.7      | 179.8        | 179.2  | -0.6     |
| $d_6$ | -66.3           | -69.8 | -3.5     | -122.1           | -113.1 | 9.0      | -84.4         | -75.2  | 9.2      | -125.7         | -124.1 | 1.5      | -91.6        | -88.0  | 3.6      |
| $d_7$ | 8.9             | 17.0  | 8.0      | 121.7            | 68.6   | -53.1    | -59.5         | -81.8  | -22.4    | 156.8          | 153.2  | -3.6     |              |        |          |

  

|                     |                     |                          |                                 |                                 |
|---------------------|---------------------|--------------------------|---------------------------------|---------------------------------|
| $r_1 = r(ORu)$      | $r_5 = r(RuN_{11})$ | $a_1 = a(ORuN_{19})$     | $d_1 = d(RuN_{11}C_{10}C_9)$    | $d_5 = d(RuN_{45}C_{46}C_{47})$ |
| $r_2 = r(OH_{54})$  | $r_6 = r(RuN_{19})$ | $a_2 = a(ORuN_{25})$     | $d_2 = d(RuN_3C_2C_1)$          | $d_6 = d(N_3RuN_{45}C_{46})$    |
| $r_3 = r(OH_{55})$  | $r_7 = r(RuN_{25})$ | $a_3 = a(H_{54}OH_{55})$ | $d_3 = d(RuN_{19}C_{18}C_{17})$ | $d_7 = d(N_{25}RuOH_{54})$      |
| $r_4 = r(RuN_{45})$ | $r_8 = r(RuN_3)$    | $a_4 = a(RuOH_{54})$     | $d_4 = d(RuN_{25}C_{24}C_{23})$ |                                 |

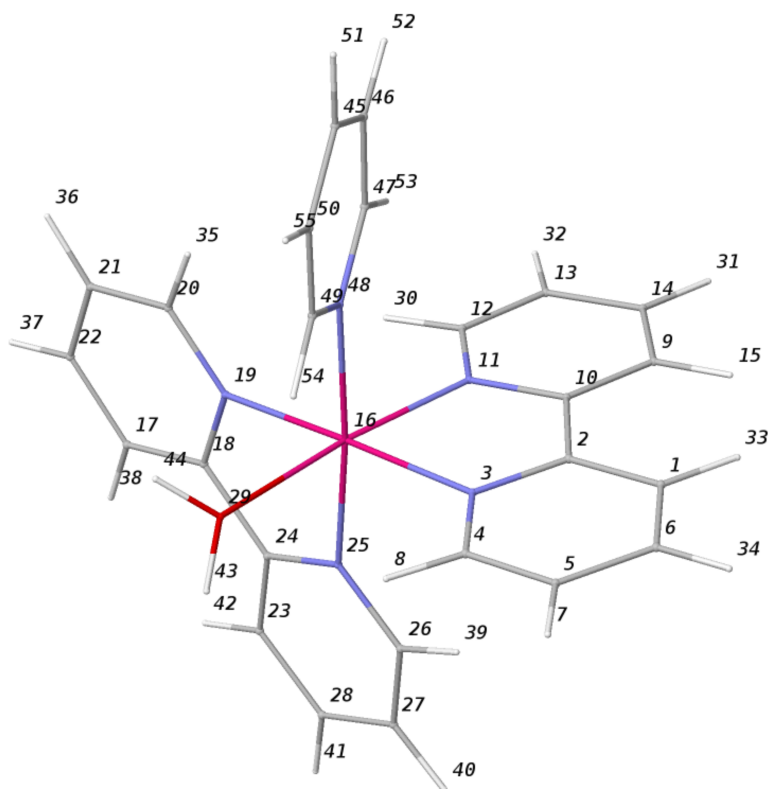Figure S3: Atomic numbering of  $Ru^{II}(H_2O)$ .



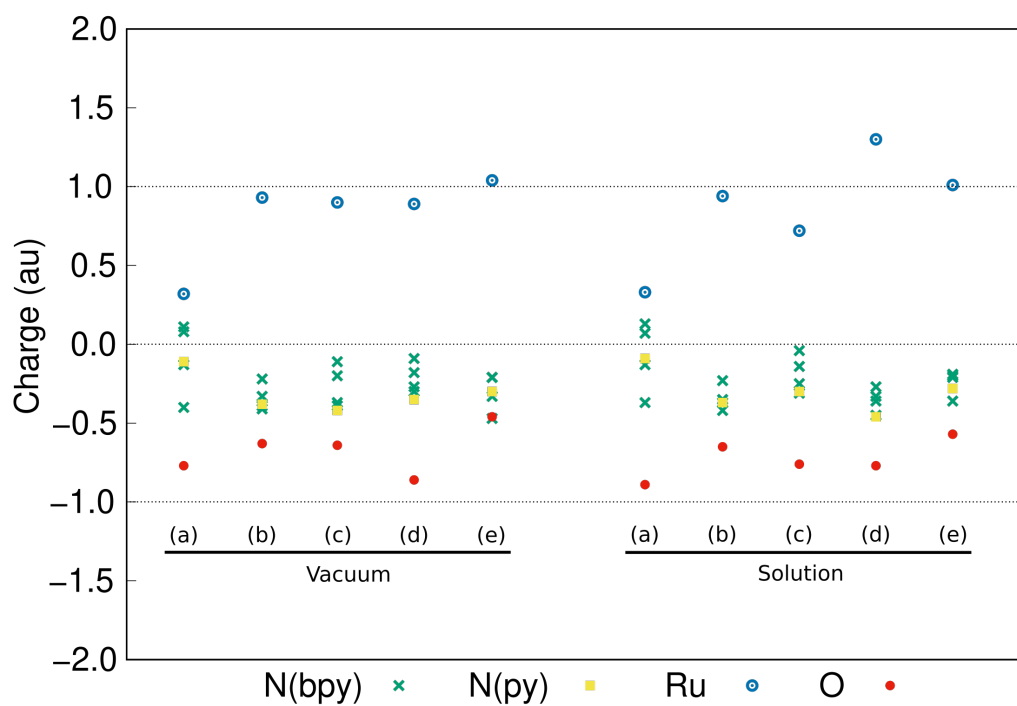

Figure S4: Diagram of the N, Ru and O charges (in au) of the *Ru*-Aqua/Oxo complexes in vacuum (VAC) and in aqueous solution (SOL). The complexes are represented by letters: (a)  $Ru^{II}(H_2O)$ ; (b)  $Ru^{III}(H_2O)$ ; (c)  $Ru^{II}(OH)$ ; (d)  $Ru^{III}(OH)$ ; (e)  $Ru^{IV}(O)$ .

Table S3: Atomic charges (in au) of the most relevant atoms and group of atoms of the *Ru*-Aqua/Oxo complexes in vacuum (VAC) and in aqueous solution (SOL). The complexes are represented by letters: (a)  $Ru^{II}(H_2O)$ ; (b)  $Ru^{III}(H_2O)$ ; (c)  $Ru^{II}(OH)$ ; (d)  $Ru^{III}(OH)$ ; (e)  $Ru^{IV}(O)$ .

|                  |            | <i>Ru</i> | <i>O</i> | <i>N</i> <sub>3</sub> | <i>N</i> <sub>11</sub> | <i>N</i> <sub>19</sub> | <i>N</i> <sub>25</sub> | <i>N</i> <sub>45</sub> | $\Sigma N$ | bpy1  | bpy2  | py    | Aqua  |
|------------------|------------|-----------|----------|-----------------------|------------------------|------------------------|------------------------|------------------------|------------|-------|-------|-------|-------|
| $Ru^{II}(H_2O)$  | VAC        | 0.93      | -0.63    | -0.22                 | -0.33                  | -0.39                  | -0.41                  | -0.38                  | -1.74      | 0.46  | 0.33  | 0.19  | 0.10  |
|                  | SOL        | 0.94      | -0.65    | -0.23                 | -0.42                  | -0.37                  | -0.35                  | -0.37                  | -1.75      | 0.39  | 0.36  | 0.18  | 0.13  |
|                  | $\Delta q$ | 0.01      | -0.02    | -0.01                 | -0.09                  | 0.02                   | 0.06                   | 0.01                   | -0.01      | -0.07 | 0.03  | -0.01 | 0.03  |
| $Ru^{III}(H_2O)$ | VAC        | 0.89      | -0.86    | -0.18                 | -0.27                  | -0.09                  | -0.30                  | -0.35                  | -1.20      | 0.81  | 0.82  | 0.37  | 0.12  |
|                  | SOL        | 1.30      | -0.77    | -0.36                 | -0.27                  | -0.33                  | -0.45                  | -0.46                  | -1.87      | 0.68  | 0.58  | 0.28  | 0.16  |
|                  | $\Delta q$ | 0.41      | 0.09     | -0.18                 | 0.00                   | -0.24                  | -0.15                  | -0.11                  | -0.67      | -0.13 | -0.24 | -0.09 | 0.04  |
| $Ru^{II}(OH)$    | VAC        | 0.32      | -0.77    | 0.08                  | -0.40                  | 0.11                   | -0.13                  | -0.11                  | -0.47      | 0.37  | 0.55  | 0.25  | -0.50 |
|                  | SOL        | 0.33      | -0.89    | 0.08                  | -0.37                  | 0.13                   | -0.13                  | -0.09                  | -0.39      | 0.43  | 0.58  | 0.27  | -0.61 |
|                  | $\Delta q$ | 0.01      | -0.12    | 0.00                  | 0.03                   | 0.02                   | 0.00                   | 0.02                   | 0.07       | 0.06  | 0.03  | 0.02  | -0.11 |
| $Ru^{III}(OH)$   | VAC        | 0.90      | -0.64    | -0.20                 | -0.39                  | -0.11                  | -0.37                  | -0.42                  | -1.49      | 0.53  | 0.65  | 0.22  | -0.30 |
|                  | SOL        | 0.72      | -0.76    | -0.14                 | -0.31                  | -0.04                  | -0.25                  | -0.30                  | -1.03      | 0.63  | 0.74  | 0.27  | -0.37 |
|                  | $\Delta q$ | -0.18     | -0.12    | 0.06                  | 0.08                   | 0.07                   | 0.12                   | 0.12                   | 0.46       | 0.10  | 0.09  | 0.05  | -0.07 |
| $Ru^{IV}(O)$     | VAC        | 1.04      | -0.46    | -0.21                 | -0.47                  | -0.21                  | -0.33                  | -0.30                  | -1.52      | 0.51  | 0.63  | 0.28  | -0.46 |
|                  | SOL        | 1.01      | -0.57    | -0.20                 | -0.36                  | -0.21                  | -0.19                  | -0.28                  | -1.24      | 0.58  | 0.68  | 0.30  | -0.57 |
|                  | $\Delta q$ | -0.03     | -0.11    | 0.01                  | 0.11                   | 0.00                   | 0.14                   | 0.02                   | 0.28       | 0.07  | 0.05  | 0.02  | -0.11 |

Table S4: Atomic charge variations (in au) of the *Ru*-Aqua/Oxo complexes in solution due to oxidation and deprotonation processes, indicated by arrows.

|              | $Ru^{II}(H_2O)$  | $Ru^{II}(OH)$   | $Ru^{II}(H_2O)$   | $Ru^{III}(H_2O)$  | $Ru^{III}(OH)$       |
|--------------|------------------|-----------------|-------------------|-------------------|----------------------|
|              | $-e \downarrow$  | $-e \downarrow$ | $\downarrow -H^+$ | $\downarrow -H^+$ | $-e \downarrow -H^+$ |
|              | $Ru^{III}(H_2O)$ | $Ru^{III}(OH)$  | $Ru^{II}(OH)$     | $Ru^{III}(OH)$    | $Ru^{IV}O$           |
| <i>Ru</i>    | 0.36             | 0.39            | -0.61             | -0.58             | 0.29                 |
| <i>O</i>     | -0.12            | 0.13            | -0.24             | 0.01              | 0.19                 |
| $\Sigma N$   | -0.12            | -0.63           | 1.35              | 0.84              | -0.21                |
| <i>bpy</i> 1 | 0.29             | 0.20            | 0.04              | -0.05             | -0.05                |
| <i>bpy</i> 2 | 0.22             | 0.16            | 0.22              | 0.16              | -0.06                |
| <i>py</i>    | 0.10             | 0.00            | 0.09              | -0.01             | 0.03                 |
| Aqua         | 0.03             | 0.61            | -0.74             | -0.53             | -0.20                |

Table S5: Potential energy profile of  $Ru^{II}(H_2O)$  for the dissociation of  $H_2O$ . Energies calculated using B3LYP/(aug)-cc-pVDZ(PP-Ru) under the restricted and unrestricted self-consistent field (SCF) approaches. The SCF energy for the complete system and for the sum of the fragments ( $H_2O$  and the remaining complex) and the basis set superposition error (BSSE) calculated using the Counter-Poise method are presented. The scan is done varying linearly the distance between Ru and the oxygen of  $H_2O$  (Ow) from 1.72691 to 5.0 Angstrom.

| Ru-Ow<br>Distance (Å) | Energies in Hartree          |              |                               |              |             |              |
|-----------------------|------------------------------|--------------|-------------------------------|--------------|-------------|--------------|
|                       | SCF Energy (complete system) |              | SCF Energy (sum of fragments) |              | BSSE energy |              |
|                       | Restricted                   | Unrestricted | Restricted                    | Unrestricted | Restricted  | Unrestricted |
| 1.72691               | -1409.8696                   | -1409.869581 | -1409.905166                  | -1409.905158 | 0.003315    | 0.0033       |
| 1.82691               | -1409.905257                 | -1409.905249 | -1409.905165                  | -1409.905159 | 0.003072    | 0.003068     |
| 1.92691               | -1409.925743                 | -1409.925748 | -1409.905163                  | -1409.905159 | 0.002812    | 0.002819     |
| 2.02691               | -1409.936607                 | -1409.936617 | -1409.905162                  | -1409.905159 | 0.002581    | 0.002592     |
| 2.12691               | -1409.94151                  | -1409.941526 | -1409.90516                   | -1409.905159 | 0.002386    | 0.002403     |
| 2.22691               | -1409.942845                 | -1409.942858 | -1409.905159                  | -1409.905159 | 0.00223     | 0.002242     |
| 2.32691               | -1409.942134                 | -1409.942132 | -1409.905157                  | -1409.90516  | 0.002099    | 0.002095     |
| 2.42691               | -1409.940316                 | -1409.940309 | -1409.905156                  | -1409.90516  | 0.001965    | 0.001951     |
| 2.52691               | -1409.93799                  | -1409.937989 | -1409.905154                  | -1409.90516  | 0.001822    | 0.001815     |
| 2.62691               | -1409.935512                 | -1409.935525 | -1409.905152                  | -1409.90516  | 0.001682    | 0.001686     |
| 2.72691               | -1409.933106                 | -1409.933118 | -1409.90515                   | -1409.90516  | 0.001557    | 0.001561     |
| 5.0                   | -1409.913516                 | -1409.913509 | -1409.905144                  | -1409.905136 | 0.000394    | 0.000394     |

Table S6: Binding energy profile for the dissociation of  $H_2O$  from  $Ru^{II}(H_2O)$ . Energies calculated using B3LYP/(aug)-cc-pVDZ(PP-Ru) under the restricted and unrestricted self-consistent field (SCF) approaches. The raw binding energy refer to the interacting energy between the fragments ( $H_2O$  and the remaining complex), but without the BSSE correction. Corrected binding energy is calculated as the difference between the energy of the complete system minus the energy of the sum of the fragments summed to the BSSE energy. The scan is done varying linearly the distance between Ru and the oxygen of  $H_2O$  (Ow) from 1.72691 to 5.0 Angstrom.

| Ru-Ow<br>Distance (Å) | Energies in kcal/mol |              |                            |              |
|-----------------------|----------------------|--------------|----------------------------|--------------|
|                       | Binding Energy (raw) |              | Binding Energy (corrected) |              |
|                       | Restricted           | Unrestricted | Restricted                 | Unrestricted |
| 1.72691               | 22.317731            | 22.325113    | 24.397621                  | 24.395924    |
| 1.82691               | -0.057819            | -0.056742    | 1.870096                   | 1.868502     |
| 1.92691               | -12.914061           | -12.919956   | -11.149562                 | -11.150884   |
| 2.02691               | -19.732278           | -19.739929   | -18.112599                 | -18.113187   |
| 2.12691               | -22.809746           | -22.820121   | -21.312397                 | -21.312251   |
| 2.22691               | -23.64828            | -23.655883   | -22.249101                 | -22.248783   |
| 2.32691               | -23.203223           | -23.20072    | -21.886143                 | -21.8863     |
| 2.42691               | -22.063648           | -22.056369   | -20.830615                 | -20.831904   |
| 2.52691               | -20.605166           | -20.600497   | -19.461948                 | -19.46126    |
| 2.62691               | -19.051173           | -19.054197   | -17.9956                   | -17.995912   |
| 2.72691               | -17.542804           | -17.543969   | -16.566059                 | -16.564526   |
| 5.0                   | -5.252928            | -5.253768    | -5.005749                  | -5.006684    |

Table S7: Energies, in eV, of the HOMO or SOMO ( $E_{HS}$ ) and LUMO ( $E_L$ ) orbitals of the Ru-Aqua/Oxo complexes, in vacuum and in solution.  $\Delta E_{HS}^{VAC/SOL}$  and  $\Delta E_L^{VAC/SOL}$  represent the energetic variations of  $E_{HS}$  and  $E_L$  due to the solvent (PCM) effect.  $\Delta E_{HSL}$  represents the fundamental gap HOMO(or SOMO)-LUMO.

|                  | $E_{HS}$ |       |                           | $E_L$  |       |                        | $\Delta E_{HSL}$ |      |
|------------------|----------|-------|---------------------------|--------|-------|------------------------|------------------|------|
|                  | VAC      | SOL   | $\Delta E_{HS}^{VAC/SOL}$ | VAC    | SOL   | $\Delta E_L^{VAC/SOL}$ | VAC              | SOL  |
| $Ru^{II}(H_2O)$  | -11.43   | -6.11 | 5.32                      | -7.97  | -2.73 | 5.24                   | 3.46             | 3.38 |
| $Ru^{III}(H_2O)$ | -15.81   | -7.92 | 7.89                      | -11.34 | -3.37 | 7.97                   | 4.47             | 4.55 |
| $Ru^{II}(OH)$    | -7.35    | -5.02 | 2.33                      | -4.96  | -2.44 | 2.52                   | 2.39             | 2.58 |
| $Ru^{III}(OH)$   | -12.26   | -7.12 | 5.14                      | -8.24  | -2.96 | 5.28                   | 4.02             | 4.16 |
| $Ru^{IV}(O)$     | -12.18   | -7.05 | 5.13                      | -8.24  | -3.03 | 5.21                   | 3.94             | 4.02 |

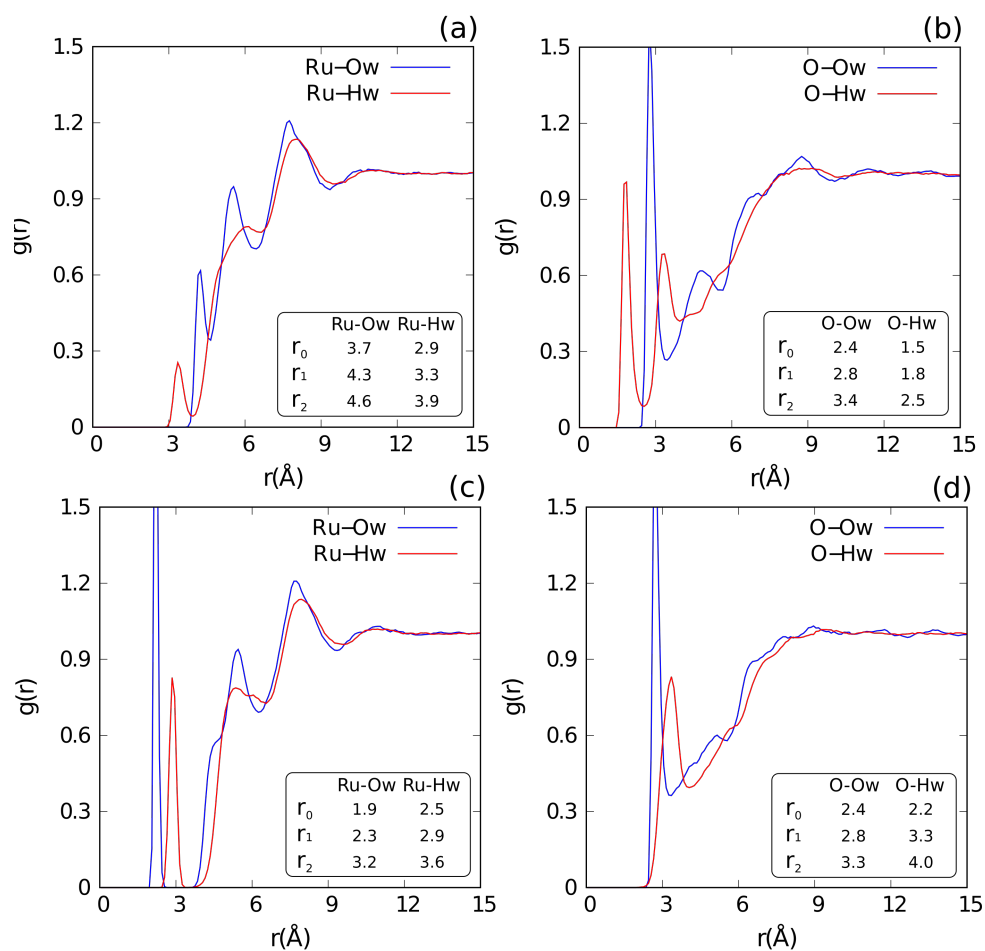

Figure S5: Radial distribution functions between Ru, O, and the oxygens (Ow) and hydrogens (Hw) of the solvent molecules for  $Ru^{III}(OH)^{2+}$  (a, b) and  $Ru^{III}(H_2O)^{3+}$  (c, d). The characteristic distances that demarcate the beginning of each RDF, the position of the first peak and the position of the first valley are indicated in the graphs by the labels  $r_0$ ,  $r_1$  and  $r_2$ , respectively.

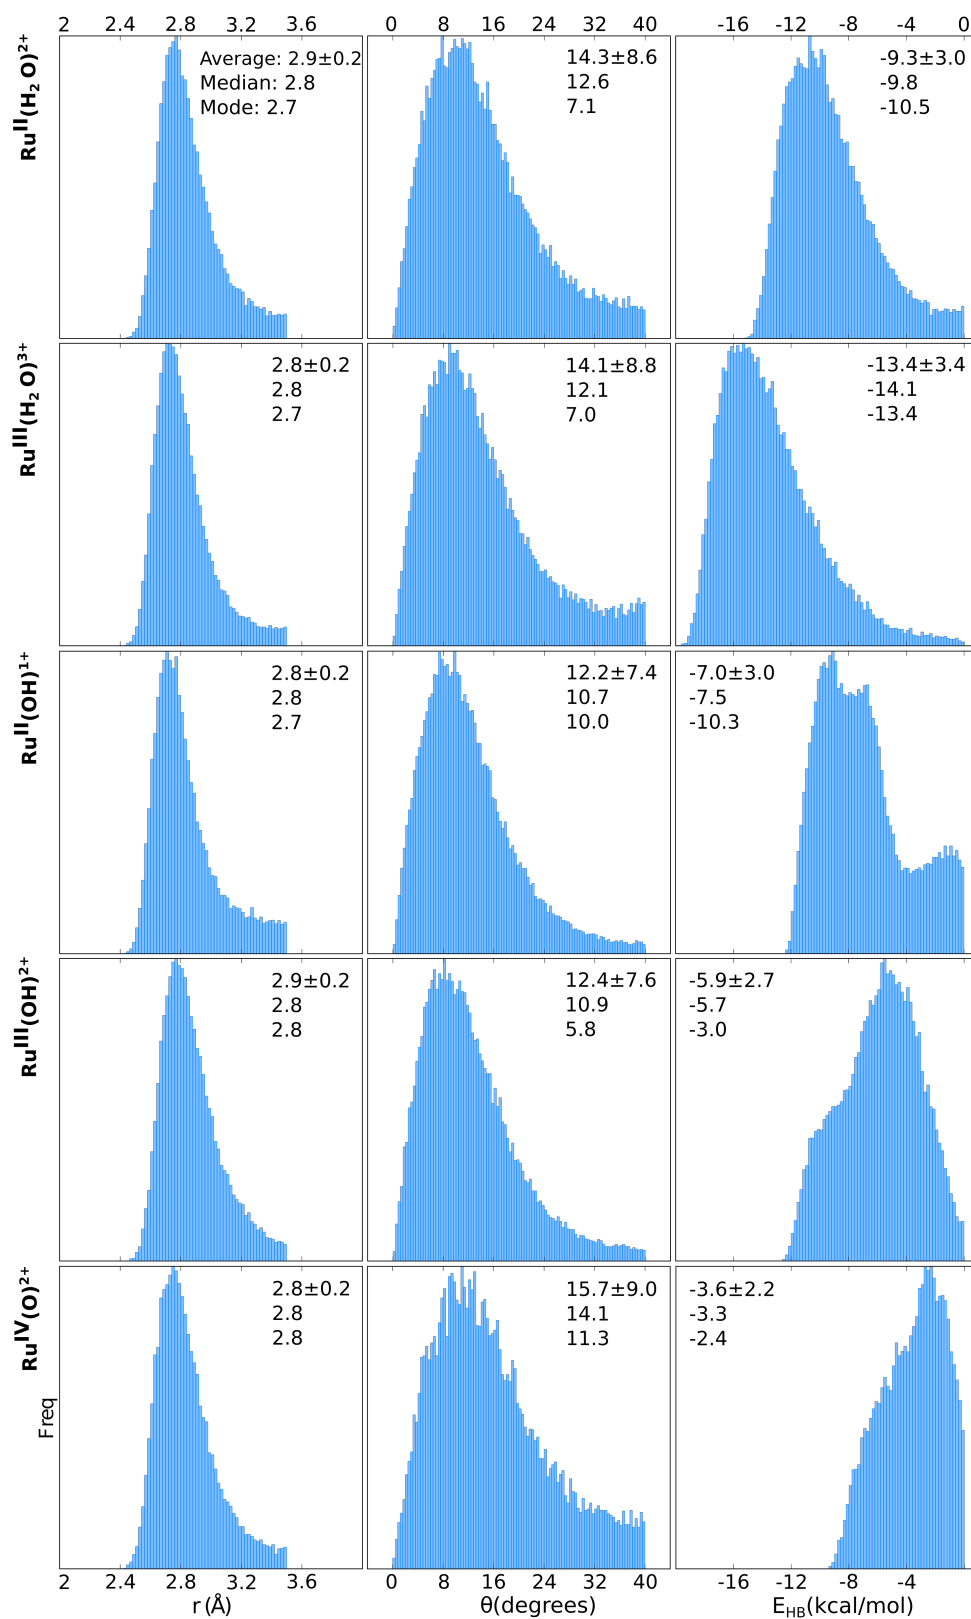

Figure S6: Distance  $r$  (Å), angle  $\theta$  (degrees) and energy  $E$  (kcal/mol) distributions of the hydrogen bonds formed between the *Ru*-Aqua/Oxo complexes and the solvent. Distributions generated from the MC simulations.

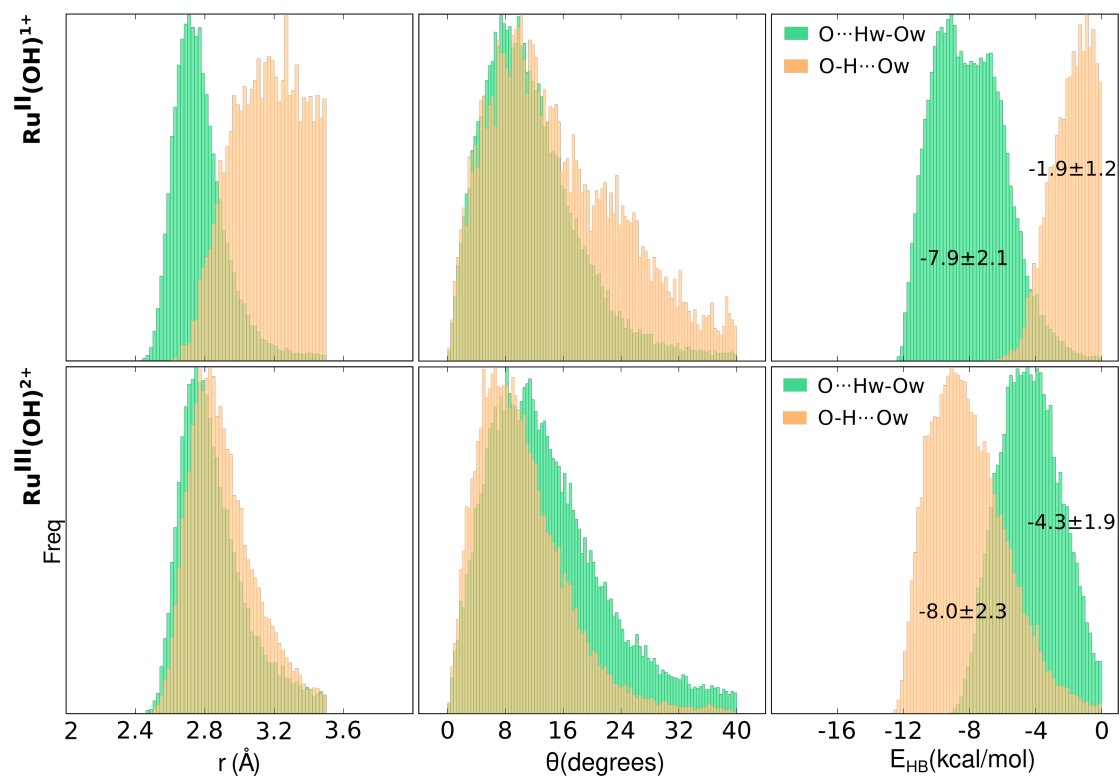

Figure S7: Distance  $r$  (Å), angle  $\theta$  (degrees) and energy  $E$  (kcal/mol) distributions of the hydrogen bonds formed between the  $Ru$ -hydroxo complexes and the solvent. In green and yellow, the distributions relative to hydrogen bonds of the types  $O \cdots H_W - O_W$  and  $O - H \cdots O_W$ , respectively. Distributions generated from the MC simulations.

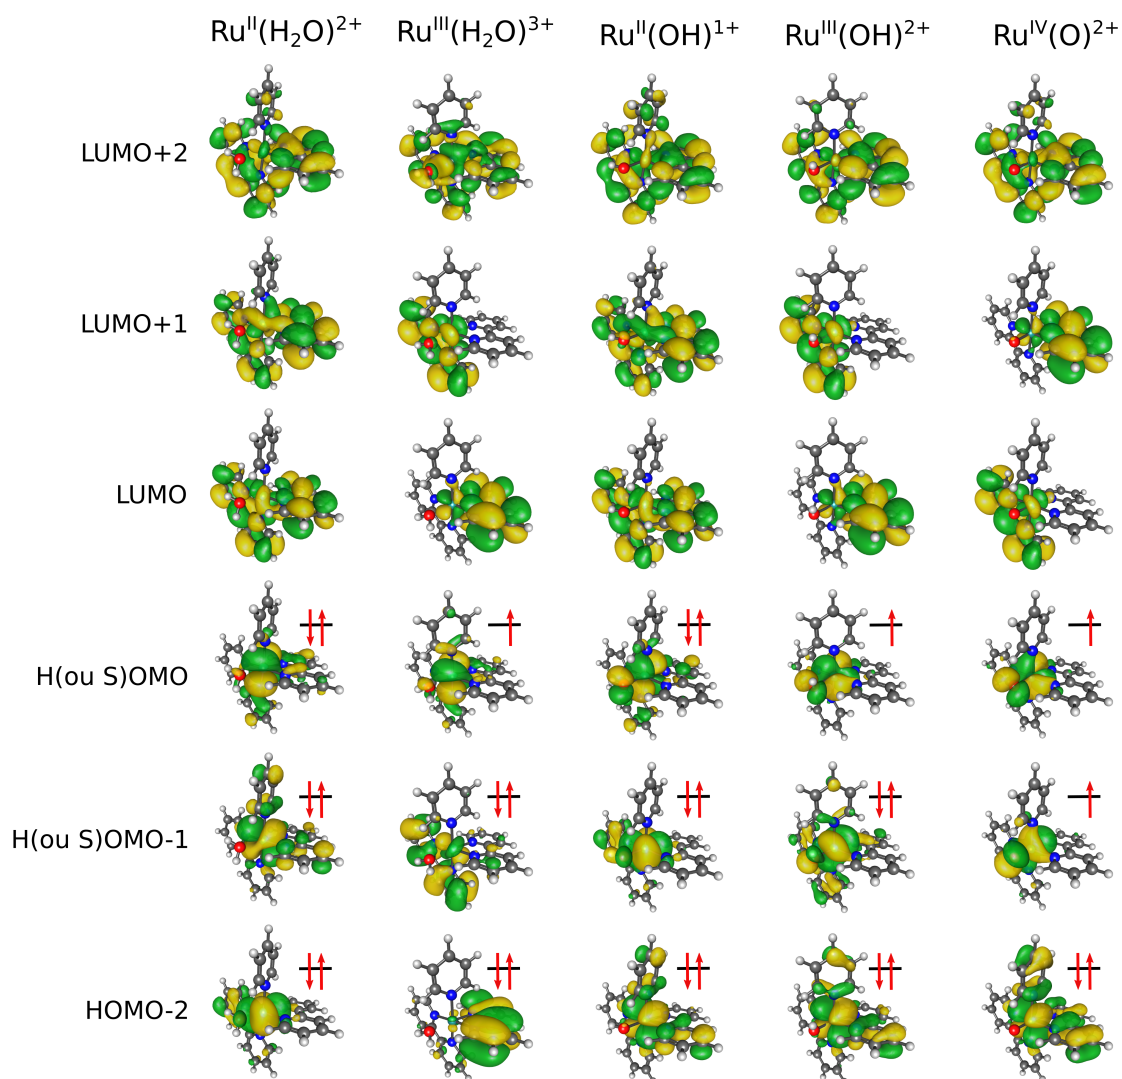

Figure S8: Frontier molecular orbitals of the Ru-Aqua/Oxo complexes.



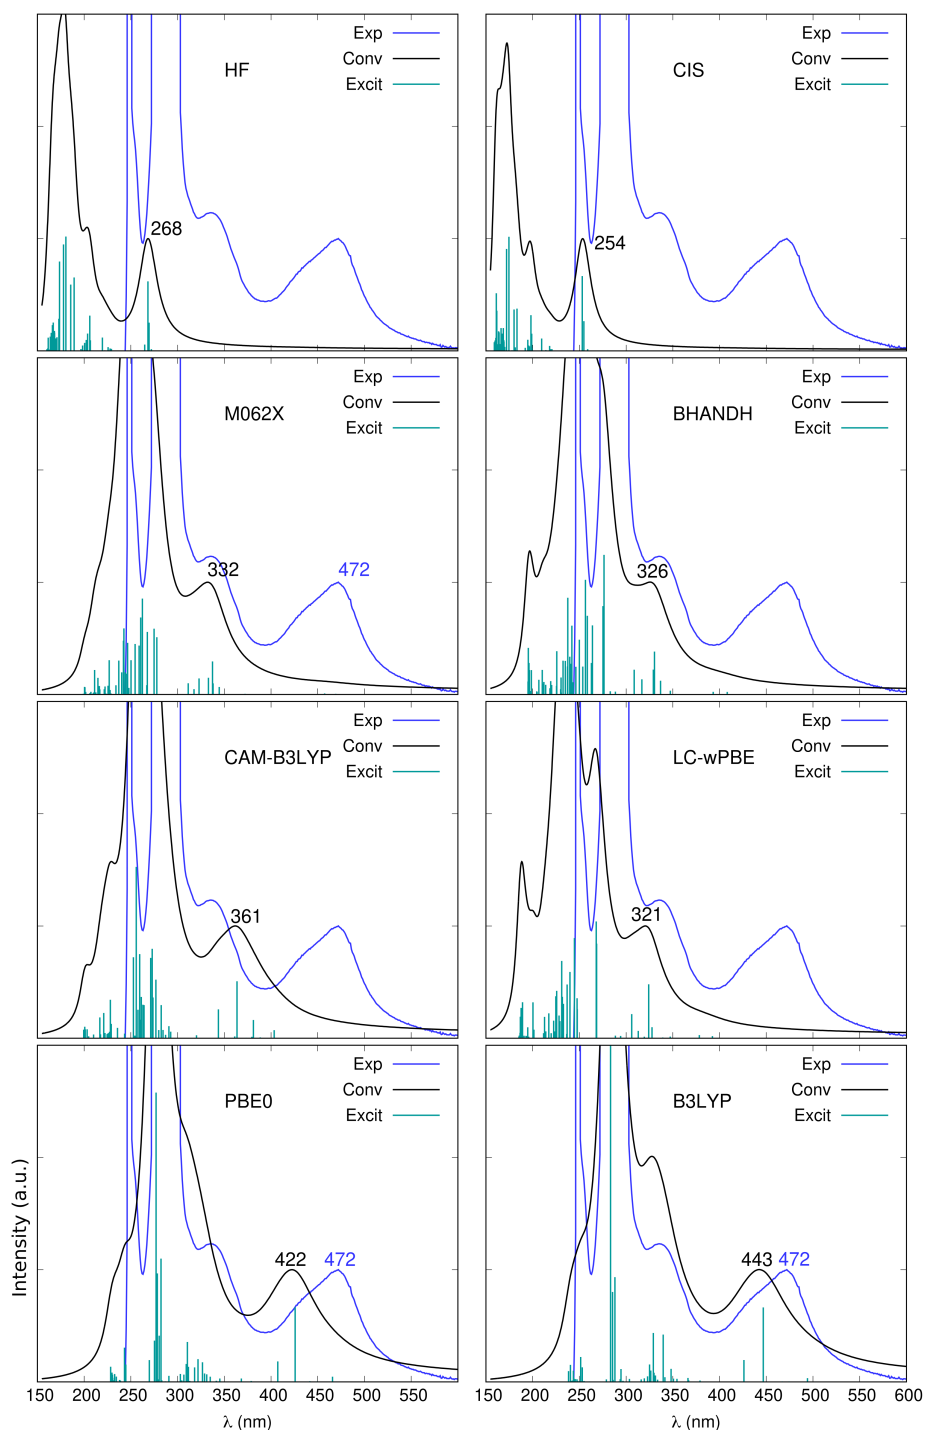

Figure S9: Theoretical UV-Vis absorption spectrum of the  $Ru^{II}(H_2O)$  complex in aqueous solution, obtained with different methods, and using the basis set (aug)-cc-pVDZ/(PP-Ru). The first 50 calculated electronic excitations are represented by vertical bars, and the convoluted spectrum was obtained from the sum of Lorentzian functions of width 0.15 eV centered on each excitation. Solvent effects were included in the calculations using the continuous PCM model. Experimental spectrum presented for comparison.

Table S8: Wavelength value  $\lambda$  (nm) of the absorption peak of the lower energy band of the complex  $Ru^{II}(H_2O)$  in aqueous solution, using the B3LYP functional and several sets of basis set. Solvent effects included via the PCM model. Deviation of  $\lambda$  from experimental value ( $\Delta\lambda = \lambda^{exp} - \lambda^{teo}$ ), and actual processing time (in hours) using 10 Intel(R) processors Xeon(R) 2.40GHz E7-2870 CPU and 100GB RAM.

| Tipo             | Base                           | $\lambda$ (nm) | $\Delta\lambda$ (nm) | Tempo (h) |
|------------------|--------------------------------|----------------|----------------------|-----------|
|                  | cc-pVDZ/(PP- <i>Ru</i> )       | 438.36         | 33.64                | 0.7       |
|                  | cc-pVTZ/(PP- <i>Ru</i> )       | 448.26         | 23.74                | 24.4      |
|                  | cc-pVQZ/(PP- <i>Ru</i> )       | 450.89         | 21.11                | 91.2      |
|                  | (aug)-cc-pVDZ/(PP- <i>Ru</i> ) | 446.80         | 25.20                | 16.8      |
| All-electron/ECP | (aug)-cc-pVTZ/(PP- <i>Ru</i> ) | 451.26         | 20.74                | 182.4     |
|                  | LANL2DZ                        | 435.95         | 36.05                | 0.4       |
|                  | DEF2TZVP                       | 442.73         | 35.31                | 19.2      |
|                  | DEF2QZVP                       | 447.76         | 29.27                | 379.2     |
|                  | DEF2QZVPP                      | 447.92         | 24.24                | 412.8     |
|                  | Sapporo-DZP-2012               | 422.00         | 50.0                 | 4.8       |
| All-electron     | Sapporo-TZP-2012               | 431.84         | 40.16                | 45.6      |
|                  | Sapporo-QZP-2012               | 433.49         | 38.51                | 278.4     |
|                  | Jorge-ADZP                     | 517.96         | -45.96               | 2.1       |
|                  | Jorge-ATZP                     | 458.94         | 13.06                | 26.4      |
| All-electron DKH | Jorge-AQZP                     | 450.31         | 21.69                | 340.8     |
|                  | ANO-RCC-VDZP                   | 440.67         | 31.33                | 45.6      |
|                  | Experimental                   | 472.0          |                      |           |

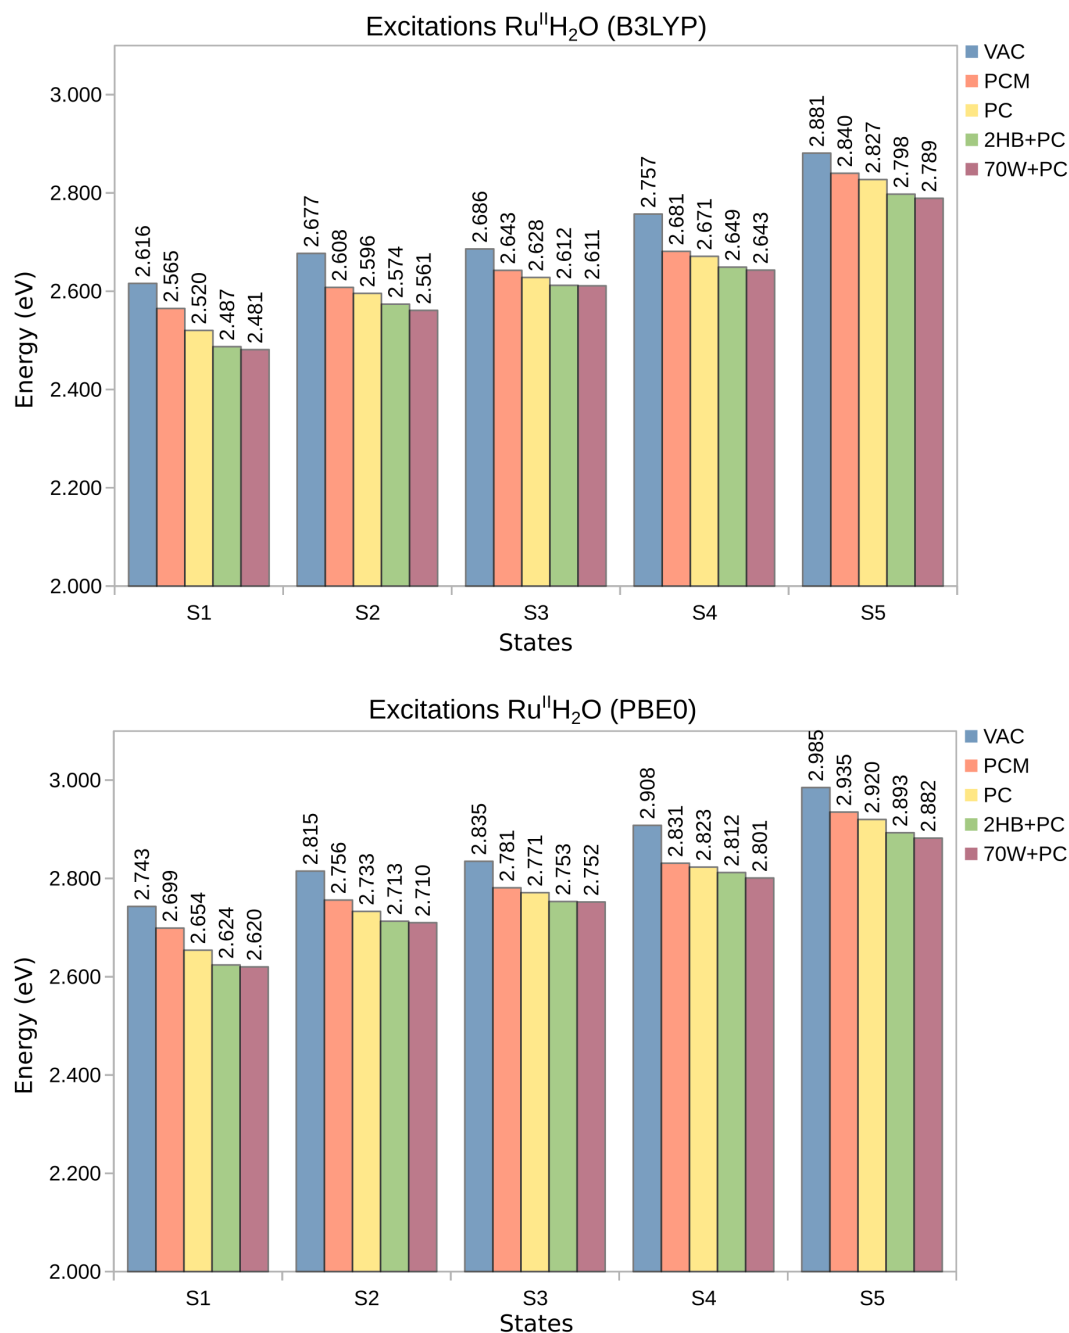

Figure S10: Comparison of implicit and explicit solvation effects on the electronic excitation energies of  $Ru^{II}H_2O$ . Excitation energies calculated for the first 5 excited states for five configurations extracted from the MC simulation, using B3LYP and PBE0, and the basis sets (aug)-cc-pVDZ(PP for Ru) for the complex and cc-pVDZ for the solvent molecules. VAC, PCM, PC, 2HB+PC and 70W+PC stands for vacuum, polarized continuum model, point charges, two explicit hydrogen bonds plus point charges, seventy explicit solvent molecules plus point charges, respectively. Standard deviation of the calculated energies are smaller than 20 meV for all excitations. Excitation S5 is the most intense one, responsible for the low-lying MLCT band in the visible range.

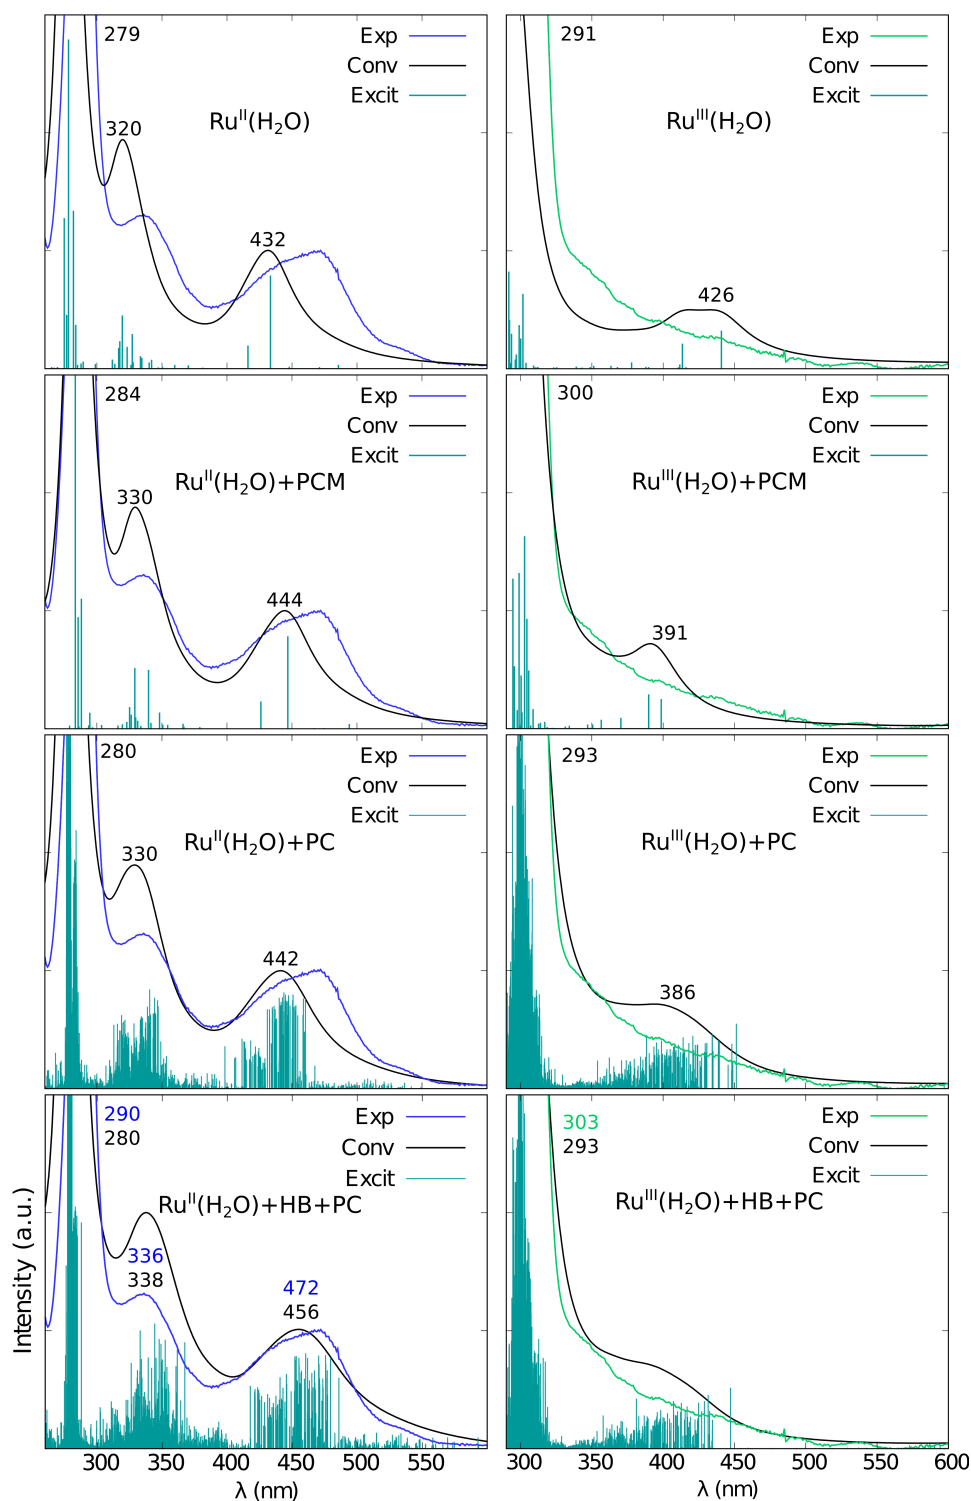

Figure S11: Theoretical UV-Vis absorption spectra of the *Ru*-Aqua complexes in vacuum and in aqueous solution. Electronic excitations, represented by vertical bars, calculated with the TD-DFT method and using B3LYP/(aug)-cc-pVDZ(PP-*Ru*). Theoretical spectra generated from the Lorentzian convolution of width 0.15 eV centered on each excitation. Solvent effects treated with PCM, PC and PC+HB models. Experimental spectra presented for comparison.

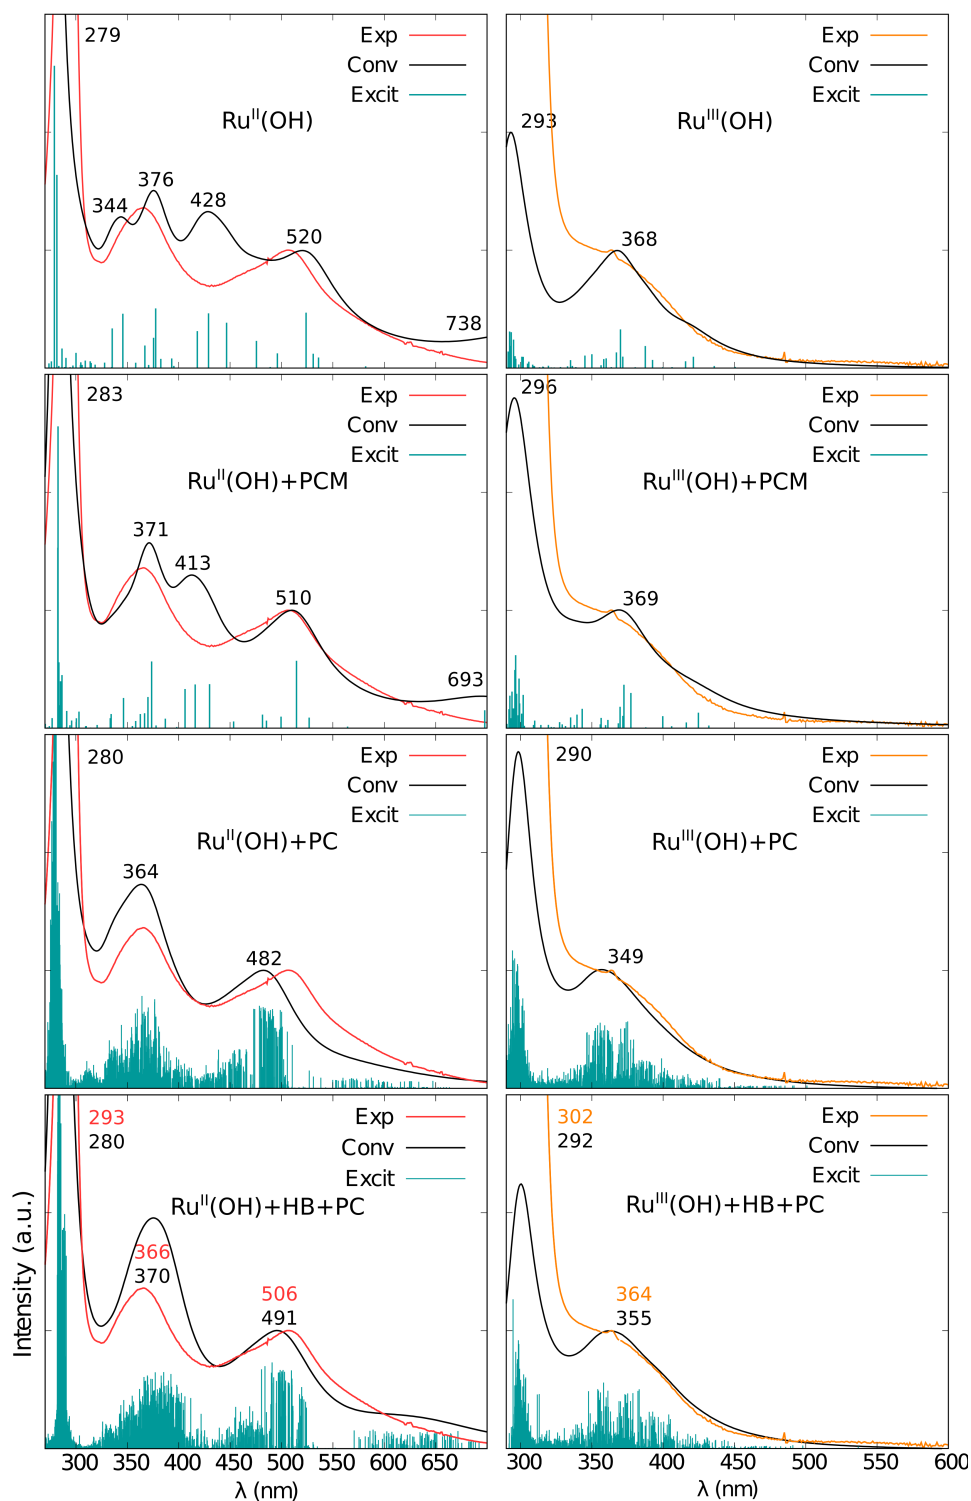

Figure S12: Theoretical UV-Vis absorption spectra of the *Ru*-hydroxo complexes in vacuum and in aqueous solution. Electronic excitations, represented by vertical bars, calculated with the TD-DFT method and using B3LYP/(aug)-cc-pVDZ(PP-*Ru*). Theoretical spectra generated from the Lorentzian convolution of width 0.15 eV centered on each excitation. Solvent effects treated with PCM, PC and PC+HB models. Experimental spectra presented for comparison.

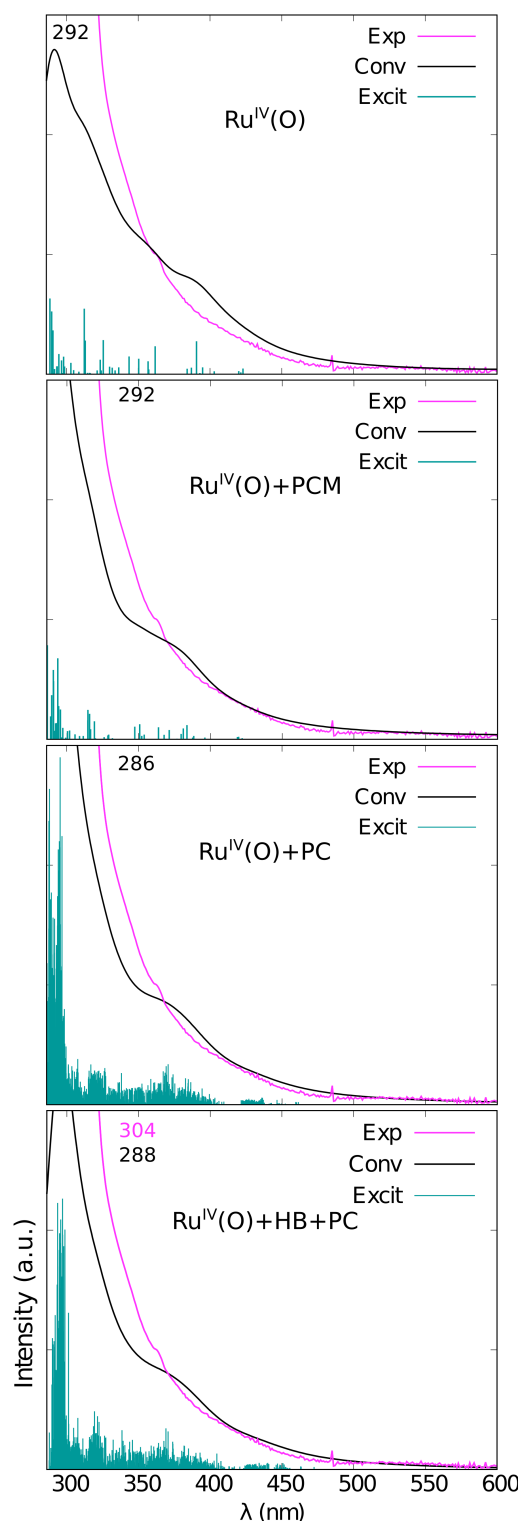

Figure S13: Theoretical UV-Vis absorption spectra of the *Ru*-oxo complexes in vacuum and in aqueous solution. Electronic excitations, represented by vertical bars, calculated with the TD-DFT method and using B3LYP/(aug)-cc-pVDZ(PP-*Ru*). Theoretical spectra generated from the Lorentzian convolution of width 0.15 eV centered on each excitation. Solvent effects treated with PCM, PC and PC+HB models. Experimental spectra presented for comparison.

Table S9: Wavelength  $\lambda$  (in nm) and intensity  $I$  ( $\times 10^{-3}$ ) of the first 50 electronic excitations of the *Ru*-Aqua/Oxo complexes in the oxidation state *II*, calculated with the TD-DFT method, using B3LYP/(aug)-cc-pVDZ(PP-*Ru*). Solute-solvent interactions treated with PCM, PC and PC+HB methods.

|        |                | <i>Ru<sup>II</sup>(H<sub>2</sub>O)</i> |                |     |                |     |                |       |                |       |         | <i>Ru<sup>II</sup>(OH)</i> |     |                |     |                |     |                |     |
|--------|----------------|----------------------------------------|----------------|-----|----------------|-----|----------------|-------|----------------|-------|---------|----------------------------|-----|----------------|-----|----------------|-----|----------------|-----|
|        |                | VAC                                    |                | PCM |                | PC  |                | HB+PC |                |       |         | VAC                        |     | PCM            |     | PC             |     | HB+PC          |     |
| States | $\lambda$ (nm) | $I$                                    | $\lambda$ (nm) | $I$ | $\lambda$ (nm) | $I$ | $\lambda$ (nm) | $I$   | $\lambda$ (nm) | $I$   | Estados | $\lambda$ (nm)             | $I$ | $\lambda$ (nm) | $I$ | $\lambda$ (nm) | $I$ | $\lambda$ (nm) | $I$ |
| 1      | 485.7          | 4                                      | 494.2          | 7   | 512.3          | 4   | 537.5          | 6     | 1              | 808.2 | 5       | 745.6                      | 4   | 621.9          | 3   | 647.5          | 13  |                |     |
| 2      | 471.1          | 2                                      | 489.9          | 1   | 493.0          | 2   | 516.4          | 4     | 2              | 738.3 | 21      | 697.8                      | 25  | 576.7          | 7   | 605.4          | 10  |                |     |
| 3      | 468.3          | 1                                      | 474.4          | 1   | 476.5          | 5   | 496.0          | 5     | 3              | 581.9 | 2       | 564.4                      | 2   | 536.0          | 1   | 545.0          | 0   |                |     |
| 4      | 448.0          | 2                                      | 467.2          | 1   | 456.2          | 19  | 474.8          | 20    | 4              | 536.0 | 10      | 526.9                      | 15  | 506.2          | 8   | 509.1          | 16  |                |     |
| 5      | 433.4          | 103                                    | 446.8          | 134 | 442.3          | 73  | 460.1          | 57    | 5              | 530.9 | 14      | 514.7                      | 93  | 487.7          | 74  | 497.5          | 63  |                |     |
| 6      | 416.2          | 25                                     | 426.1          | 40  | 421.3          | 31  | 435.9          | 38    | 6              | 523.9 | 53      | 499.6                      | 16  | 457.3          | 28  | 469.9          | 22  |                |     |
| 7      | 381.3          | 1                                      | 379.2          | 3   | 390.2          | 7   | 401.7          | 8     | 7              | 496.0 | 14      | 485.4                      | 10  | 435.5          | 15  | 455.7          | 14  |                |     |
| 8      | 370.2          | 4                                      | 367.0          | 3   | 376.5          | 5   | 388.2          | 7     | 8              | 489.1 | 1       | 481.6                      | 19  | 416.4          | 12  | 438.4          | 9   |                |     |
| 9      | 359.8          | 4                                      | 366.2          | 7   | 368.2          | 4   | 377.3          | 6     | 9              | 475.6 | 26      | 453.5                      | 9   | 397.6          | 13  | 413.0          | 7   |                |     |
| 10     | 350.3          | 2                                      | 362.1          | 0   | 362.0          | 4   | 370.9          | 7     | 10             | 446.6 | 43      | 430.1                      | 61  | 392.1          | 9   | 402.1          | 6   |                |     |
| 11     | 347.2          | 1                                      | 354.4          | 6   | 356.5          | 4   | 364.7          | 11    | 11             | 429.0 | 52      | 416.1                      | 60  | 385.8          | 14  | 393.9          | 29  |                |     |
| 12     | 342.0          | 10                                     | 350.6          | 6   | 351.5          | 9   | 358.7          | 13    | 12             | 418.2 | 35      | 406.2                      | 54  | 379.0          | 20  | 387.3          | 33  |                |     |
| 13     | 340.1          | 7                                      | 348.2          | 24  | 346.6          | 10  | 353.8          | 23    | 13             | 395.3 | 2       | 398.1                      | 2   | 374.5          | 29  | 380.6          | 36  |                |     |
| 14     | 334.5          | 12                                     | 341.5          | 9   | 342.4          | 29  | 349.3          | 28    | 14             | 393.3 | 9       | 387.1                      | 13  | 370.4          | 24  | 375.3          | 44  |                |     |
| 15     | 333.4          | 14                                     | 339.7          | 85  | 338.8          | 35  | 345.3          | 26    | 15             | 382.6 | 9       | 378.1                      | 4   | 366.0          | 23  | 365.7          | 41  |                |     |
| 16     | 327.8          | 7                                      | 333.8          | 4   | 335.1          | 21  | 341.8          | 17    | 16             | 377.6 | 57      | 373.8                      | 92  | 360.2          | 24  | 360.6          | 25  |                |     |
| 17     | 327.1          | 38                                     | 331.4          | 12  | 332.2          | 26  | 338.2          | 20    | 17             | 375.6 | 29      | 370.2                      | 43  | 355.9          | 27  | 356.3          | 16  |                |     |
| 18     | 326.2          | 4                                      | 329.9          | 17  | 329.9          | 17  | 335.1          | 21    | 18             | 370.8 | 3       | 366.8                      | 21  | 350.7          | 17  | 353.7          | 14  |                |     |
| 19     | 323.2          | 24                                     | 329.2          | 88  | 327.1          | 16  | 332.2          | 24    | 19             | 367.1 | 22      | 362.7                      | 20  | 346.5          | 17  | 351.1          | 19  |                |     |
| 20     | 319.5          | 59                                     | 326.4          | 21  | 324.6          | 16  | 329.2          | 16    | 20             | 359.7 | 0       | 358.2                      | 10  | 342.7          | 16  | 347.4          | 15  |                |     |
| 21     | 317.5          | 30                                     | 325.1          | 31  | 321.7          | 21  | 325.7          | 17    | 21             | 358.2 | 5       | 355.0                      | 3   | 336.7          | 22  | 342.8          | 15  |                |     |
| 22     | 316.7          | 23                                     | 323.0          | 10  | 319.0          | 25  | 321.0          | 11    | 22             | 345.7 | 52      | 346.3                      | 42  | 331.7          | 19  | 336.4          | 13  |                |     |
| 23     | 313.7          | 5                                      | 319.6          | 7   | 315.6          | 14  | 316.2          | 13    | 23             | 335.4 | 38      | 334.4                      | 20  | 327.2          | 13  | 328.0          | 10  |                |     |
| 24     | 311.9          | 10                                     | 316.2          | 5   | 311.0          | 7   | 310.8          | 13    | 24             | 334.9 | 1       | 333.5                      | 14  | 319.2          | 5   | 324.8          | 10  |                |     |
| 25     | 298.8          | 5                                      | 303.6          | 6   | 304.8          | 4   | 306.2          | 4     | 25             | 327.9 | 5       | 320.7                      | 4   | 315.1          | 9   | 316.5          | 3   |                |     |
| 26     | 297.2          | 0                                      | 296.7          | 2   | 300.5          | 4   | 301.7          | 4     | 26             | 318.8 | 3       | 314.3                      | 1   | 307.8          | 6   | 310.7          | 2   |                |     |
| 27     | 289.4          | 8                                      | 294.6          | 23  | 294.9          | 4   | 297.0          | 4     | 27             | 314.9 | 5       | 310.1                      | 3   | 304.5          | 4   | 306.9          | 3   |                |     |
| 28     | 287.8          | 6                                      | 293.8          | 5   | 291.9          | 6   | 293.9          | 3     | 28             | 314.0 | 7       | 309.5                      | 3   | 300.8          | 3   | 300.4          | 2   |                |     |
| 29     | 285.1          | 4                                      | 292.2          | 1   | 289.2          | 23  | 290.2          | 12    | 29             | 309.2 | 7       | 303.1                      | 23  | 296.9          | 3   | 295.8          | 2   |                |     |
| 30     | 283.7          | 48                                     | 288.1          | 189 | 286.2          | 52  | 286.0          | 52    | 30             | 306.0 | 3       | 300.6                      | 14  | 293.7          | 4   | 291.2          | 6   |                |     |
| 31     | 282.0          | 174                                    | 286.2          | 4   | 283.7          | 106 | 283.6          | 80    | 31             | 304.9 | 6       | 297.2                      | 1   | 287.9          | 56  | 287.8          | 19  |                |     |
| 32     | 278.1          | 363                                    | 285.6          | 162 | 280.7          | 176 | 281.3          | 165   | 32             | 304.5 | 3       | 295.9                      | 11  | 283.3          | 116 | 285.0          | 28  |                |     |
| 33     | 276.7          | 59                                     | 283.4          | 727 | 278.7          | 253 | 279.3          | 255   | 33             | 300.2 | 15      | 294.3                      | 4   | 281.2          | 165 | 283.3          | 92  |                |     |
| 34     | 274.8          | 166                                    | 278.9          | 5   | 276.6          | 207 | 276.8          | 180   | 34             | 297.2 | 2       | 291.2                      | 24  | 279.7          | 197 | 281.6          | 143 |                |     |
| 35     | 269.7          | 2                                      | 266.3          | 1   | 267.7          | 7   | 270.8          | 33    | 35             | 294.4 | 1       | 289.8                      | 1   | 277.0          | 99  | 279.7          | 201 |                |     |
| 36     | 267.1          | 1                                      | 260.7          | 1   | 263.3          | 7   | 265.6          | 7     | 36             | 290.4 | 10      | 286.6                      | 73  | 274.4          | 62  | 277.7          | 113 |                |     |
| 37     | 265.2          | 2                                      | 255.0          | 2   | 257.4          | 9   | 261.5          | 6     | 37             | 289.2 | 1       | 285.1                      | 65  | 272.0          | 46  | 276.0          | 113 |                |     |
| 38     | 259.6          | 2                                      | 253.1          | 26  | 254.9          | 17  | 258.8          | 10    | 38             | 286.6 | 19      | 284.6                      | 32  | 269.2          | 23  | 273.0          | 39  |                |     |
| 39     | 257.8          | 5                                      | 251.4          | 45  | 252.7          | 13  | 256.4          | 10    | 39             | 283.4 | 2       | 283.6                      | 91  | 266.8          | 6   | 270.2          | 16  |                |     |
| 40     | 252.2          | 30                                     | 250.0          | 2   | 251.0          | 17  | 254.4          | 13    | 40             | 281.6 | 185     | 282.7                      | 416 | 264.3          | 6   | 267.5          | 6   |                |     |
| 41     | 250.4          | 49                                     | 248.7          | 1   | 249.4          | 10  | 252.7          | 13    | 41             | 279.1 | 290     | 282.5                      | 249 | 262.1          | 5   | 265.4          | 4   |                |     |
| 42     | 245.6          | 3                                      | 247.9          | 2   | 248.0          | 9   | 251.2          | 12    | 42             | 276.2 | 6       | 276.9                      | 14  | 260.1          | 6   | 263.5          | 4   |                |     |
| 43     | 244.5          | 2                                      | 247.5          | 5   | 246.6          | 9   | 249.7          | 17    | 43             | 273.9 | 4       | 274.2                      | 3   | 258.8          | 7   | 261.6          | 4   |                |     |
| 44     | 242.3          | 2                                      | 245.6          | 5   | 244.9          | 11  | 248.3          | 12    | 44             | 270.4 | 1       | 272.4                      | 1   | 257.5          | 10  | 260.0          | 5   |                |     |
| 45     | 241.2          | 3                                      | 244.1          | 7   | 243.7          | 14  | 247.1          | 12    | 45             | 269.7 | 1       | 270.3                      | 6   | 256.3          | 9   | 258.7          | 3   |                |     |
| 46     | 240.7          | 8                                      | 243.6          | 20  | 242.5          | 12  | 245.8          | 10    | 46             | 268.8 | 190     | 268.6                      | 3   | 255.1          | 8   | 257.4          | 5   |                |     |
| 47     | 239.3          | 28                                     | 242.4          | 3   | 241.4          | 10  | 244.8          | 12    | 47             | 266.4 | 16      | 263.4                      | 4   | 253.8          | 6   | 256.5          | 5   |                |     |
| 48     | 237.8          | 13                                     | 240.9          | 2   | 240.3          | 12  | 243.4          | 10    | 48             | 265.5 | 31      | 263.4                      | 0   | 252.4          | 11  | 255.1          | 5   |                |     |
| 49     | 236.9          | 6                                      | 240.5          | 31  | 239.2          | 11  | 242.2          | 12    | 49             | 264.5 | 6       | 259.7                      | 3   | 251.1          | 13  | 253.8          | 8   |                |     |
| 50     | 236.5          | 11                                     | 238.4          | 19  | 238.1          | 12  | 241.3          | 8     | 50             | 262.1 | 5       | 258.6                      | 1   | 250.0          | 13  | 252.4          | 13  |                |     |

Table S10: Wavelength  $\lambda$  (in nm) and intensity  $I$  ( $\times 10^{-3}$ ) of the first 50 electronic excitations of the *Ru*-Aqua/Oxo complexes in the oxidation state *III*, calculated with the TD-DFT method, using B3LYP/(aug)-cc-pVDZ(PP-*Ru*). Solute-solvent interactions treated with PCM, PC and PC+HB methods.

| States | <i>Ru<sup>III</sup>(H<sub>2</sub>O)</i> |          |                |          |                |          |                |          | Estados | <i>Ru<sup>III</sup>(OH)</i> |          |                |          |                |          |                |          |
|--------|-----------------------------------------|----------|----------------|----------|----------------|----------|----------------|----------|---------|-----------------------------|----------|----------------|----------|----------------|----------|----------------|----------|
|        | VAC                                     |          | PCM            |          | PC             |          | HB+PC          |          |         | VAC                         |          | PCM            |          | PC             |          | HB+PC          |          |
|        | $\lambda$ (nm)                          | <i>I</i> | $\lambda$ (nm) | <i>I</i> | $\lambda$ (nm) | <i>I</i> | $\lambda$ (nm) | <i>I</i> |         | $\lambda$ (nm)              | <i>I</i> | $\lambda$ (nm) | <i>I</i> | $\lambda$ (nm) | <i>I</i> | $\lambda$ (nm) | <i>I</i> |
| 1      | 746.1                                   | 1        | 677.5          | 1        | 717.6          | 0        | 698.4          | 0        | 1       | 470.9                       | 1        | 459.6          | 1        | 473.8          | 0        | 476.4          | 1        |
| 2      | 735.9                                   | 0        | 667.2          | 0        | 707.3          | 0        | 688.1          | 0        | 2       | 460.7                       | 0        | 449.4          | 0        | 463.6          | 0        | 466.2          | 0        |
| 3      | 725.6                                   | 2        | 657.0          | 3        | 697.1          | 2        | 677.9          | 2        | 3       | 450.4                       | 1        | 439.1          | 0        | 453.3          | 1        | 455.9          | 1        |
| 4      | 683.1                                   | 2        | 636.5          | 2        | 644.8          | 1        | 623.7          | 1        | 4       | 435.8                       | 2        | 432.0          | 2        | 437.0          | 2        | 441.2          | 2        |
| 5      | 603.6                                   | 0        | 532.9          | 0        | 549.7          | 0        | 534.4          | 0        | 5       | 421.2                       | 10       | 424.7          | 13       | 417.0          | 3        | 422.7          | 3        |
| 6      | 440.8                                   | 32       | 419.9          | 0        | 437.1          | 3        | 438.5          | 1        | 6       | 415.7                       | 6        | 416.3          | 5        | 410.0          | 2        | 412.9          | 3        |
| 7      | 425.2                                   | 0        | 417.3          | 0        | 429.2          | 4        | 425.7          | 2        | 7       | 406.2                       | 1        | 405.9          | 2        | 401.9          | 4        | 406.1          | 3        |
| 8      | 416.0                                   | 1        | 415.3          | 0        | 416.6          | 6        | 418.3          | 4        | 8       | 399.6                       | 1        | 399.7          | 10       | 393.6          | 8        | 397.9          | 7        |
| 9      | 413.5                                   | 21       | 412.4          | 0        | 411.8          | 3        | 411.6          | 4        | 9       | 395.4                       | 0        | 393.4          | 0        | 387.2          | 3        | 391.3          | 6        |
| 10     | 411.7                                   | 4        | 398.7          | 27       | 407.1          | 6        | 405.0          | 6        | 10      | 392.6                       | 7        | 387.8          | 1        | 382.0          | 5        | 387.2          | 7        |
| 11     | 410.7                                   | 1        | 389.8          | 31       | 393.9          | 14       | 395.5          | 8        | 11      | 387.5                       | 19       | 377.4          | 30       | 377.6          | 11       | 382.5          | 9        |
| 12     | 389.7                                   | 2        | 375.1          | 1        | 382.6          | 6        | 382.6          | 8        | 12      | 380.5                       | 1        | 372.5          | 37       | 370.7          | 6        | 376.3          | 9        |
| 13     | 387.8                                   | 2        | 370.3          | 10       | 372.8          | 5        | 372.8          | 7        | 13      | 371.7                       | 10       | 371.8          | 10       | 365.2          | 8        | 369.9          | 10       |
| 14     | 377.9                                   | 5        | 360.5          | 0        | 365.6          | 5        | 366.0          | 5        | 14      | 370.1                       | 33       | 369.8          | 18       | 362.3          | 8        | 365.4          | 8        |
| 15     | 368.0                                   | 2        | 356.6          | 8        | 360.0          | 3        | 361.3          | 4        | 15      | 367.2                       | 13       | 368.6          | 4        | 359.5          | 9        | 362.2          | 9        |
| 16     | 363.4                                   | 3        | 350.6          | 4        | 355.7          | 2        | 356.8          | 3        | 16      | 363.6                       | 1        | 361.2          | 7        | 355.3          | 12       | 359.6          | 9        |
| 17     | 359.4                                   | 3        | 348.7          | 1        | 352.2          | 2        | 353.1          | 3        | 17      | 360.0                       | 8        | 359.6          | 3        | 351.1          | 21       | 355.8          | 12       |
| 18     | 351.3                                   | 3        | 347.0          | 4        | 348.7          | 1        | 350.1          | 2        | 18      | 358.3                       | 8        | 356.5          | 9        | 347.3          | 14       | 352.7          | 15       |
| 19     | 348.8                                   | 2        | 343.7          | 0        | 345.2          | 1        | 347.1          | 2        | 19      | 356.4                       | 2        | 355.9          | 3        | 342.7          | 8        | 349.1          | 11       |
| 20     | 343.2                                   | 1        | 339.6          | 1        | 341.6          | 1        | 344.3          | 1        | 20      | 350.0                       | 12       | 343.2          | 16       | 337.9          | 7        | 345.2          | 6        |
| 21     | 342.5                                   | 1        | 337.6          | 0        | 338.1          | 1        | 341.3          | 1        | 21      | 345.1                       | 11       | 339.6          | 12       | 333.8          | 4        | 341.3          | 7        |
| 22     | 339.0                                   | 2        | 334.2          | 3        | 335.2          | 1        | 338.6          | 1        | 22      | 338.8                       | 1        | 337.7          | 3        | 330.1          | 3        | 336.6          | 4        |
| 23     | 334.3                                   | 0        | 331.4          | 2        | 332.3          | 2        | 335.3          | 1        | 23      | 336.3                       | 2        | 335.1          | 9        | 327.6          | 3        | 333.3          | 5        |
| 24     | 325.3                                   | 1        | 329.9          | 0        | 329.1          | 1        | 332.8          | 1        | 24      | 335.0                       | 7        | 331.6          | 2        | 325.7          | 2        | 329.8          | 3        |
| 25     | 323.3                                   | 1        | 324.0          | 1        | 325.1          | 1        | 329.6          | 1        | 25      | 332.9                       | 2        | 329.2          | 3        | 323.9          | 3        | 327.5          | 4        |
| 26     | 318.6                                   | 0        | 322.4          | 1        | 321.8          | 1        | 326.7          | 1        | 26      | 328.0                       | 1        | 327.4          | 5        | 321.9          | 2        | 325.4          | 3        |
| 27     | 317.5                                   | 0        | 320.4          | 1        | 319.4          | 1        | 323.7          | 1        | 27      | 323.7                       | 1        | 323.4          | 1        | 320.1          | 2        | 323.0          | 2        |
| 28     | 312.2                                   | 2        | 318.7          | 2        | 316.8          | 1        | 320.5          | 1        | 28      | 321.6                       | 1        | 321.5          | 1        | 318.6          | 1        | 321.3          | 2        |
| 29     | 311.4                                   | 1        | 317.0          | 6        | 314.9          | 1        | 318.5          | 1        | 29      | 319.5                       | 2        | 319.5          | 3        | 316.9          | 2        | 319.5          | 2        |
| 30     | 310.3                                   | 1        | 313.9          | 5        | 312.6          | 2        | 316.5          | 1        | 30      | 316.0                       | 1        | 317.4          | 0        | 315.2          | 2        | 317.8          | 1        |
| 31     | 309.1                                   | 3        | 312.6          | 5        | 310.1          | 3        | 314.6          | 1        | 31      | 315.6                       | 1        | 314.3          | 3        | 312.3          | 3        | 316.1          | 2        |
| 32     | 305.7                                   | 0        | 308.7          | 18       | 307.1          | 4        | 312.4          | 2        | 32      | 313.3                       | 1        | 309.9          | 6        | 310.0          | 3        | 313.7          | 3        |
| 33     | 303.8                                   | 5        | 307.1          | 3        | 304.6          | 13       | 309.8          | 6        | 33      | 309.8                       | 1        | 309.1          | 3        | 307.5          | 3        | 311.6          | 4        |
| 34     | 301.7                                   | 63       | 305.7          | 52       | 302.7          | 18       | 307.5          | 6        | 34      | 309.4                       | 2        | 302.7          | 2        | 305.2          | 3        | 309.7          | 2        |
| 35     | 300.1                                   | 26       | 304.4          | 98       | 300.9          | 24       | 305.3          | 11       | 35      | 308.5                       | 3        | 301.9          | 28       | 303.3          | 3        | 307.4          | 3        |
| 36     | 299.0                                   | 37       | 302.8          | 172      | 299.5          | 31       | 303.2          | 18       | 36      | 305.8                       | 5        | 300.7          | 12       | 301.2          | 4        | 305.4          | 3        |
| 37     | 297.0                                   | 2        | 301.0          | 15       | 298.2          | 32       | 301.2          | 24       | 37      | 304.9                       | 4        | 299.3          | 21       | 299.5          | 4        | 303.3          | 3        |
| 38     | 297.0                                   | 12       | 300.4          | 48       | 297.0          | 31       | 299.8          | 24       | 38      | 301.9                       | 10       | 298.9          | 42       | 298.0          | 5        | 301.8          | 4        |
| 39     | 296.3                                   | 8        | 299.6          | 3        | 295.8          | 35       | 298.6          | 29       | 39      | 300.9                       | 10       | 298.3          | 11       | 296.5          | 10       | 300.1          | 6        |
| 40     | 293.7                                   | 30       | 299.0          | 139      | 294.5          | 44       | 297.2          | 44       | 40      | 298.7                       | 3        | 297.3          | 29       | 295.2          | 14       | 299.0          | 8        |
| 41     | 292.9                                   | 5        | 297.7          | 17       | 293.0          | 47       | 296.1          | 29       | 41      | 296.7                       | 8        | 296.6          | 62       | 293.9          | 19       | 297.6          | 9        |
| 42     | 292.2                                   | 42       | 295.7          | 56       | 291.9          | 69       | 294.7          | 37       | 42      | 296.1                       | 10       | 296.0          | 49       | 293.0          | 22       | 296.2          | 16       |
| 43     | 291.8                                   | 82       | 294.6          | 134      | 290.6          | 69       | 293.3          | 49       | 43      | 295.1                       | 24       | 295.0          | 17       | 291.9          | 20       | 295.2          | 13       |
| 44     | 288.8                                   | 88       | 289.3          | 39       | 289.0          | 43       | 292.3          | 58       | 44      | 293.5                       | 30       | 294.0          | 31       | 291.0          | 24       | 294.1          | 15       |
| 45     | 287.3                                   | 29       | 287.7          | 4        | 287.7          | 31       | 291.1          | 57       | 45      | 292.6                       | 19       | 293.3          | 8        | 290.1          | 34       | 293.2          | 19       |
| 46     | 286.8                                   | 50       | 287.5          | 5        | 286.4          | 22       | 289.8          | 57       | 46      | 292.3                       | 31       | 292.5          | 28       | 289.2          | 37       | 292.2          | 19       |
| 47     | 286.1                                   | 6        | 286.6          | 4        | 285.3          | 19       | 288.5          | 51       | 47      | 291.3                       | 14       | 291.9          | 16       | 288.3          | 28       | 291.4          | 28       |
| 48     | 285.2                                   | 16       | 284.8          | 6        | 284.2          | 13       | 286.8          | 22       | 48      | 289.8                       | 2        | 290.5          | 4        | 287.1          | 25       | 290.4          | 24       |
| 49     | 285.0                                   | 48       | 283.3          | 19       | 283.2          | 11       | 285.4          | 21       | 49      | 289.2                       | 8        | 289.9          | 50       | 286.0          | 15       | 289.5          | 21       |
| 50     | 282.4                                   | 4        | 280.5          | 2        | 282.0          | 11       | 284.3          | 14       | 50      | 288.6                       | 35       | 288.9          | 41       | 285.1          | 17       | 288.5          | 20       |



Table S11: Wavelength  $\lambda$  (in *nm*) and intensity  $I$  ( $\times 10^{-3}$ ) of the first 50 electronic excitations of the *Ru*-Aqua/Oxo complexes in the oxidation state *IV*, calculated with the TD-DFT method, using B3LYP/(aug)-cc-pVDZ(PP-*Ru*). Solute-solvent interactions treated with PCM, PC and PC+HB methods.

| States | <i>Ru</i> <sup>IV</sup> (O) |          |           |          |           |          |           |          |
|--------|-----------------------------|----------|-----------|----------|-----------|----------|-----------|----------|
|        | VAC                         |          | PCM       |          | PC        |          | HB+PC     |          |
|        | $\lambda$                   | <i>I</i> | $\lambda$ | <i>I</i> | $\lambda$ | <i>I</i> | $\lambda$ | <i>I</i> |
| 1      | 626.0                       | 1        | 651.2     | 1        | 675.2     | 1        | 683.1     | 0        |
| 2      | 606.4                       | 0        | 628.1     | 0        | 637.2     | 0        | 646.9     | 0        |
| 3      | 433.3                       | 0        | 434.1     | 0        | 439.3     | 0        | 442.3     | 1        |
| 4      | 423.0                       | 3        | 422.1     | 1        | 425.4     | 1        | 427.9     | 1        |
| 5      | 421.5                       | 1        | 419.6     | 2        | 421.8     | 1        | 423.5     | 2        |
| 6      | 420.1                       | 1        | 418.8     | 2        | 418.1     | 2        | 419.4     | 2        |
| 7      | 403.0                       | 1        | 396.1     | 2        | 393.3     | 1        | 398.2     | 1        |
| 8      | 394.9                       | 3        | 388.4     | 3        | 389.1     | 2        | 392.6     | 2        |
| 9      | 392.9                       | 1        | 387.6     | 2        | 383.5     | 3        | 386.1     | 3        |
| 10     | 390.6                       | 15       | 383.6     | 12       | 379.7     | 3        | 381.5     | 3        |
| 11     | 389.4                       | 0        | 381.1     | 9        | 375.8     | 3        | 377.9     | 4        |
| 12     | 387.0                       | 3        | 379.6     | 5        | 373.3     | 5        | 374.8     | 4        |
| 13     | 384.1                       | 2        | 376.7     | 1        | 370.2     | 3        | 371.9     | 3        |
| 14     | 378.9                       | 3        | 371.3     | 8        | 366.9     | 3        | 369.1     | 3        |
| 15     | 361.8                       | 12       | 367.7     | 4        | 362.0     | 7        | 365.7     | 4        |
| 16     | 357.4                       | 2        | 363.8     | 10       | 358.2     | 5        | 361.7     | 4        |
| 17     | 356.9                       | 6        | 353.8     | 4        | 354.4     | 5        | 357.8     | 5        |
| 18     | 350.3                       | 7        | 352.1     | 3        | 350.3     | 4        | 354.0     | 5        |
| 19     | 343.6                       | 8        | 350.7     | 13       | 342.9     | 4        | 349.7     | 4        |
| 20     | 336.4                       | 3        | 347.3     | 11       | 338.0     | 3        | 345.1     | 4        |
| 21     | 333.9                       | 2        | 331.7     | 1        | 334.3     | 3        | 339.5     | 5        |
| 22     | 331.9                       | 3        | 329.1     | 4        | 328.7     | 4        | 335.6     | 4        |
| 23     | 330.0                       | 3        | 328.5     | 3        | 324.9     | 3        | 331.1     | 3        |
| 24     | 325.6                       | 15       | 325.9     | 2        | 322.6     | 3        | 327.9     | 3        |
| 25     | 324.2                       | 2        | 319.8     | 1        | 319.3     | 4        | 324.3     | 3        |
| 26     | 323.5                       | 6        | 319.1     | 15       | 316.6     | 7        | 322.1     | 3        |
| 27     | 321.4                       | 2        | 316.5     | 8        | 314.4     | 6        | 319.5     | 4        |
| 28     | 316.6                       | 1        | 315.8     | 21       | 312.5     | 7        | 316.9     | 7        |
| 29     | 316.1                       | 1        | 314.6     | 25       | 310.8     | 9        | 314.8     | 7        |
| 30     | 314.7                       | 1        | 314.5     | 16       | 309.0     | 7        | 312.8     | 8        |
| 31     | 313.1                       | 15       | 311.4     | 3        | 306.2     | 4        | 310.7     | 9        |
| 32     | 312.4                       | 29       | 308.8     | 3        | 304.1     | 3        | 308.7     | 7        |
| 33     | 308.6                       | 1        | 305.7     | 4        | 302.1     | 5        | 306.4     | 5        |
| 34     | 305.0                       | 2        | 301.9     | 7        | 300.2     | 4        | 304.4     | 4        |
| 35     | 303.1                       | 5        | 300.4     | 7        | 298.1     | 3        | 302.2     | 4        |
| 36     | 298.7                       | 3        | 299.1     | 1        | 296.5     | 4        | 300.4     | 4        |
| 37     | 298.0                       | 8        | 297.1     | 10       | 295.1     | 4        | 298.5     | 4        |
| 38     | 297.0                       | 1        | 296.5     | 2        | 293.8     | 4        | 297.2     | 5        |
| 39     | 296.6                       | 6        | 295.5     | 25       | 292.9     | 5        | 295.9     | 3        |
| 40     | 295.5                       | 0        | 294.2     | 28       | 291.9     | 6        | 294.8     | 4        |
| 41     | 294.7                       | 9        | 293.6     | 68       | 291.0     | 11       | 293.7     | 6        |
| 42     | 293.5                       | 4        | 292.9     | 14       | 289.9     | 13       | 292.9     | 8        |
| 43     | 293.3                       | 4        | 292.1     | 13       | 288.8     | 22       | 291.9     | 6        |
| 44     | 291.7                       | 2        | 291.4     | 7        | 287.9     | 36       | 290.8     | 17       |
| 45     | 291.0                       | 1        | 290.7     | 49       | 286.9     | 44       | 289.8     | 26       |
| 46     | 290.6                       | 19       | 290.5     | 58       | 285.7     | 50       | 288.7     | 23       |
| 47     | 289.7                       | 28       | 289.4     | 37       | 284.3     | 40       | 287.8     | 38       |
| 48     | 288.5                       | 33       | 288.6     | 19       | 282.7     | 27       | 286.8     | 40       |
| 49     | 285.8                       | 15       | 286.3     | 79       | 281.2     | 30       | 285.5     | 33       |
| 50     | 285.6                       | 11       | 285.4     | 7        | 280.0     | 35       | 284.2     | 30       |

Table S12: Wavelength,  $\lambda$  (nm), of the UV-Vis absorption peaks of the Ru-Aqua/Oxo complexes in vacuum and in aqueous solution, using B3LYP/(aug)-cc-pVDZ/(PP-Ru) and different approaches for the solute-solvent interaction (PCM, PC, HB+PC).

|       | $Ru^{II}(H_2O)$ |     |     | $Ru^{II}(OH)$ |     |     | $Ru^{III}(H_2O)$ |     | $Ru^{III}(OH)$ |     | $Ru^{IV}(O)$ |
|-------|-----------------|-----|-----|---------------|-----|-----|------------------|-----|----------------|-----|--------------|
|       | picos           |     |     | picos         |     |     | picos            |     | picos          |     | picos        |
|       | I               | II  | III | I             | II  | III | II               | III | II             | III | III          |
| VAC   | 432             | 320 | 279 | 520           | 376 | 279 | 426              | 291 | 368            | 293 | 292          |
| PCM   | 444             | 330 | 284 | 510           | 371 | 283 | 391              | 300 | 369            | 296 | 292          |
| PC    | 442             | 330 | 280 | 482           | 364 | 280 | 386              | 293 | 349            | 290 | 286          |
| HB+PC | 456             | 338 | 280 | 491           | 370 | 280 | -                | 293 | 355            | 292 | 288          |
| EXP   | 472             | 336 | 290 | 506           | 366 | 293 | -                | 303 | 364            | 302 | 304          |

Table S13: Percentage of MC, MLCT, LMCT, LC and LLCT contributions for electronic excitation groups (1-30 and 31-50).

|      | $Ru^{II}(H_2O)$ |       | $Ru^{III}(H_2O)$ |       | $Ru^{II}(OH)$ |       | $Ru^{III}(OH)$ |       | $Ru^{IV}(O)$ |       |
|------|-----------------|-------|------------------|-------|---------------|-------|----------------|-------|--------------|-------|
|      | 1-30            | 31-50 | 1-30             | 31-50 | 1-30          | 31-50 | 1-30           | 31-50 | 1-30         | 31-50 |
| MC   | 9               | 9     | 15               | 5     | 8             | 12    | 16             | 5     | 11           | 4     |
| MLCT | 60              | 30    | 16               | 18    | 58            | 30    | 34             | 24    | 25           | 21    |
| LMCT | 3               | 5     | 32               | 8     | 4             | 8     | 15             | 10    | 17           | 7     |
| LC   | 9               | 23    | 24               | 41    | 7             | 15    | 21             | 30    | 25           | 36    |
| LLCT | 19              | 33    | 13               | 28    | 23            | 35    | 14             | 31    | 22           | 32    |

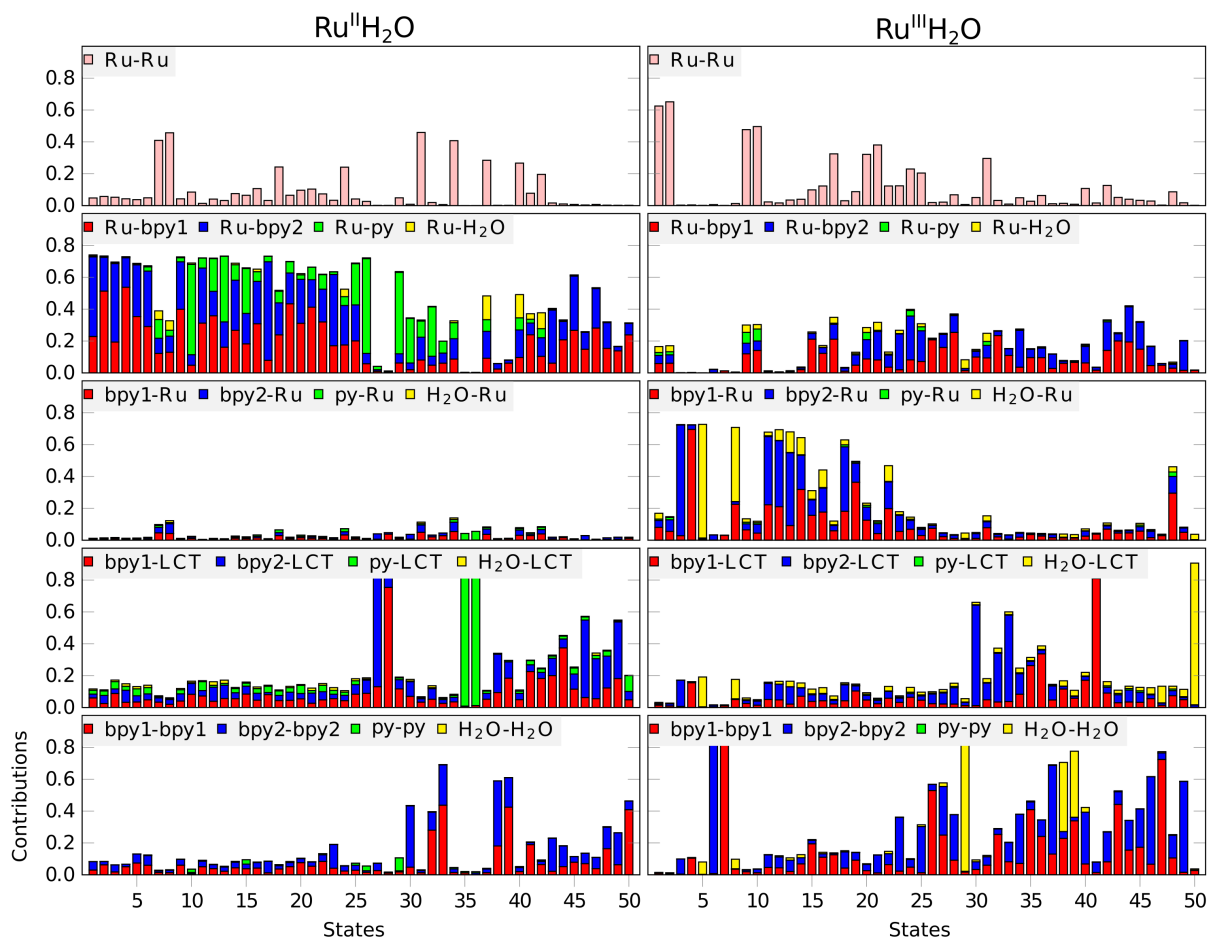

Figure S14: Detailed map of MC, MLCT, LMCT, LLCT and LC contributions in the electronic excitations of the  $Ru^{II}(H_2O)$  and  $Ru^{III}(H_2O)$  complexes in aqueous solution.

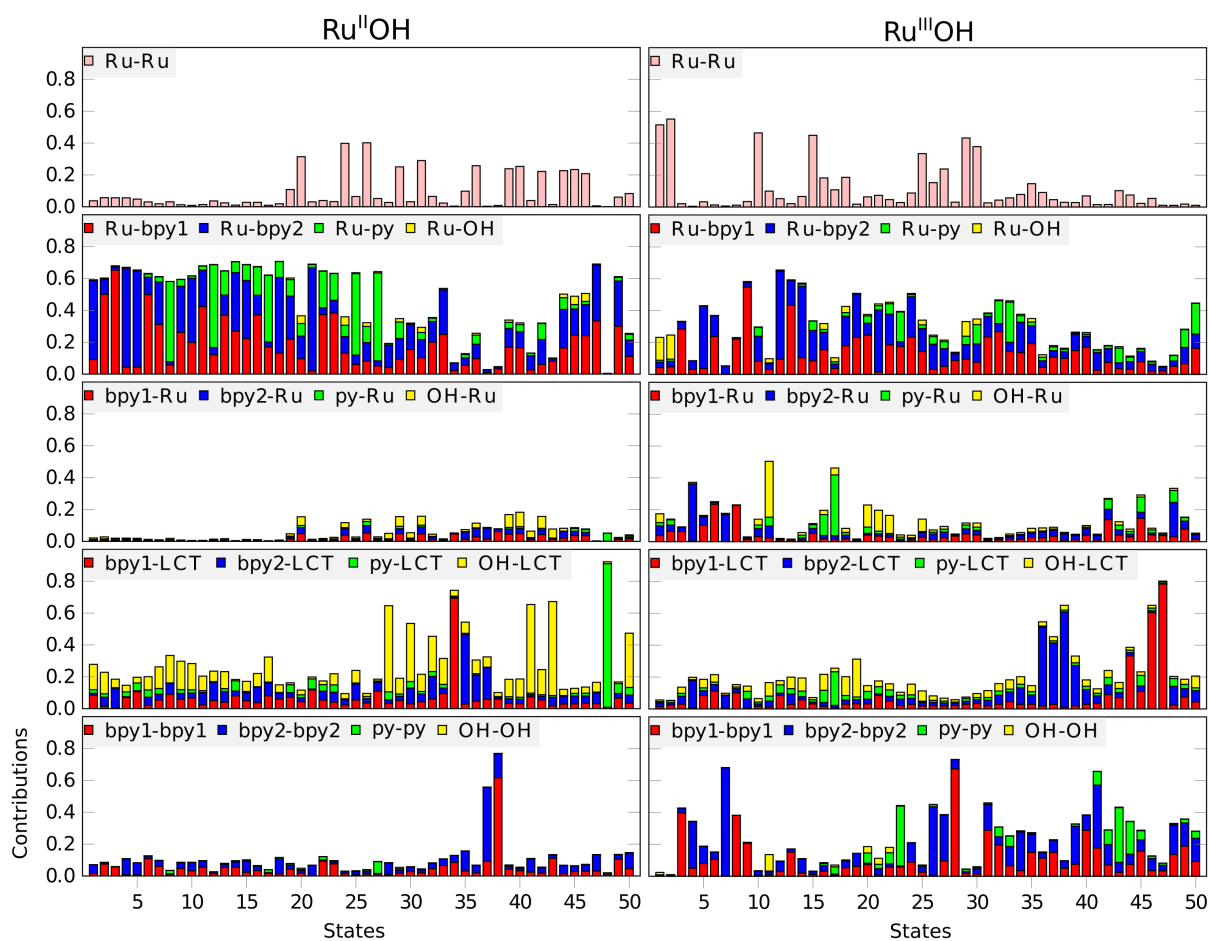

Figure S15: Detailed map of MC, MLCT, LMCT, LLCT and LC contributions in the electronic excitations of the  $Ru^{II}(OH)$  and  $Ru^{III}(OH)$  complexes in aqueous solution.

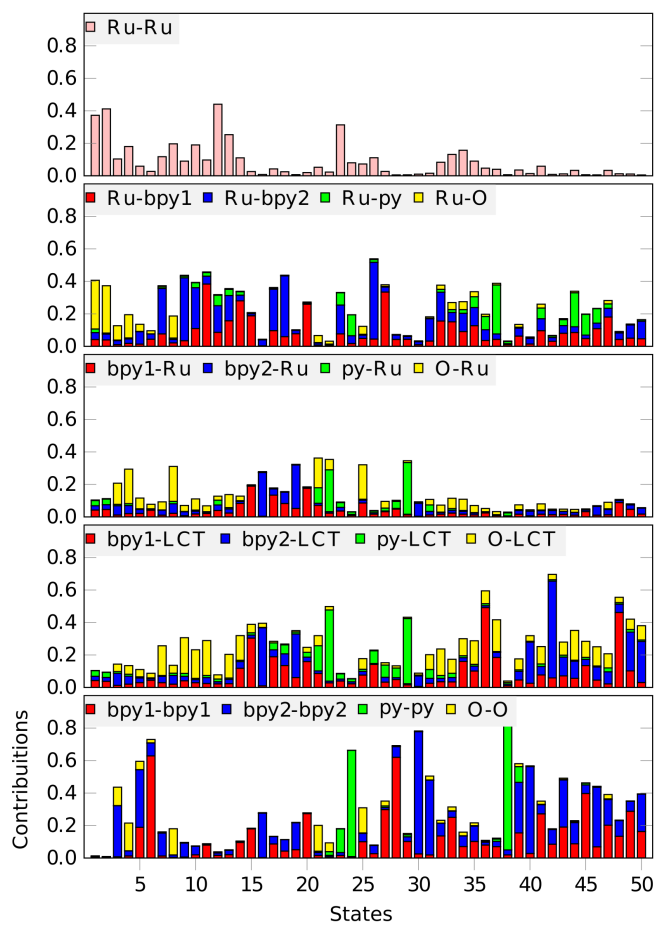

Figure S16: Detailed map of MC, MLCT, LMCT, LLCT and LC contributions in the electronic excitations of the  $Ru^{IV}(O)$  complex in aqueous solution.

### 1.3 Parameters for MC simulations

Geometry and Lennard-Jones Coulomb parameters of  $[\text{Ru}^{\text{II}}(\text{H}_2\text{O})(\text{py})(\text{bpy})_2]^{2+}$

|    | X         | Y         | Z         | Q (e)  | E (kcal/mol) | S (Ang.) |
|----|-----------|-----------|-----------|--------|--------------|----------|
| C  | -3.241264 | -2.490441 | 0.270253  | -0.151 | 0.07         | 3.55     |
| C  | -2.117089 | -1.662292 | 0.346317  | 0.122  | 0.07         | 3.55     |
| N  | -1.577458 | -1.100252 | -0.772114 | -0.234 | 0.17         | 3.25     |
| C  | -2.145056 | -1.351254 | -1.967101 | 0.099  | 0.07         | 3.55     |
| C  | -3.264207 | -2.166825 | -2.109481 | -0.128 | 0.07         | 3.55     |
| C  | -3.824039 | -2.746455 | -0.969261 | 0.042  | 0.07         | 3.55     |
| H  | -3.682532 | -2.338070 | -3.100066 | 0.133  | 0.03         | 2.42     |
| H  | -1.679183 | -0.881454 | -2.830618 | 0.095  | 0.03         | 2.42     |
| C  | -1.767906 | -1.850075 | 2.848328  | -0.199 | 0.07         | 3.55     |
| C  | -1.412783 | -1.334770 | 1.597776  | 0.249  | 0.07         | 3.55     |
| N  | -0.351592 | -0.485176 | 1.459639  | -0.420 | 0.17         | 3.25     |
| C  | 0.366001  | -0.161574 | 2.555520  | 0.233  | 0.07         | 3.55     |
| C  | 0.063305  | -0.646694 | 3.823400  | -0.164 | 0.07         | 3.55     |
| C  | -1.027047 | -1.505171 | 3.975796  | 0.072  | 0.07         | 3.55     |
| H  | -2.617447 | -2.522417 | 2.940270  | 0.148  | 0.03         | 2.42     |
| Ru | 0.048736  | 0.148231  | -0.440563 | 0.944  | 0.40         | 1.80     |
| C  | 4.177470  | 1.222272  | 0.100447  | -0.176 | 0.07         | 3.55     |
| C  | 2.949626  | 0.584468  | -0.103696 | 0.197  | 0.07         | 3.55     |
| N  | 1.775444  | 1.277776  | -0.055857 | -0.371 | 0.17         | 3.25     |
| C  | 1.818845  | 2.605053  | 0.173897  | 0.220  | 0.07         | 3.55     |
| C  | 3.007737  | 3.298052  | 0.382389  | -0.167 | 0.07         | 3.55     |
| C  | 4.211355  | 2.592502  | 0.349454  | 0.076  | 0.07         | 3.55     |
| C  | 3.901472  | -1.737327 | -0.452014 | -0.187 | 0.07         | 3.55     |
| C  | 2.816665  | -0.856467 | -0.390443 | 0.207  | 0.07         | 3.55     |
| N  | 1.541888  | -1.291571 | -0.603867 | -0.354 | 0.17         | 3.25     |
| C  | 1.338267  | -2.594715 | -0.879237 | 0.170  | 0.07         | 3.55     |
| C  | 2.375327  | -3.519559 | -0.955005 | -0.146 | 0.07         | 3.55     |
| C  | 3.683006  | -3.083250 | -0.736397 | 0.065  | 0.07         | 3.55     |
| H  | 1.204811  | 0.511774  | 2.402070  | 0.046  | 0.03         | 2.42     |
| H  | -1.295162 | -1.903065 | 4.953878  | 0.107  | 0.03         | 2.42     |
| H  | 0.678588  | -0.348764 | 4.670893  | 0.134  | 0.03         | 2.42     |
| H  | -3.661812 | -2.933032 | 1.170179  | 0.139  | 0.03         | 2.42     |
| H  | -4.700716 | -3.389265 | -1.041472 | 0.111  | 0.03         | 2.42     |
| H  | 0.863826  | 3.123441  | 0.189520  | 0.047  | 0.03         | 2.42     |
| H  | 2.978937  | 4.370986  | 0.565350  | 0.134  | 0.03         | 2.42     |
| H  | 5.162689  | 3.098793  | 0.509858  | 0.105  | 0.03         | 2.42     |
| H  | 5.104240  | 0.655183  | 0.061715  | 0.141  | 0.03         | 2.42     |
| H  | 0.308190  | -2.898450 | -1.044659 | 0.060  | 0.03         | 2.42     |
| H  | 2.150749  | -4.560706 | -1.181230 | 0.131  | 0.03         | 2.42     |
| H  | 4.521045  | -3.777767 | -0.785679 | 0.109  | 0.03         | 2.42     |
| H  | 4.912266  | -1.376969 | -0.277646 | 0.145  | 0.03         | 2.42     |
| C  | -3.264599 | 3.818474  | -0.134445 | 0.073  | 0.07         | 3.55     |
| C  | -2.586100 | 3.382026  | 1.004608  | -0.185 | 0.07         | 3.55     |
| C  | -1.656003 | 2.352829  | 0.888223  | 0.222  | 0.07         | 3.55     |
| N  | -1.369539 | 1.747772  | -0.286885 | -0.368 | 0.17         | 3.25     |
| C  | -2.036847 | 2.171091  | -1.384275 | 0.204  | 0.07         | 3.55     |
| C  | -2.979929 | 3.194966  | -1.350016 | -0.199 | 0.07         | 3.55     |
| H  | -3.997679 | 4.623118  | -0.075467 | 0.105  | 0.03         | 2.42     |
| H  | -2.768200 | 3.827718  | 1.981615  | 0.136  | 0.03         | 2.42     |

|   |           |          |           |        |        |        |
|---|-----------|----------|-----------|--------|--------|--------|
| H | -1.122018 | 1.998208 | 1.765641  | 0.030  | 0.03   | 2.42   |
| H | -1.797569 | 1.673043 | -2.320335 | 0.051  | 0.03   | 2.42   |
| H | -3.479317 | 3.490485 | -2.271844 | 0.147  | 0.03   | 2.42   |
| O | 0.337714  | 0.673429 | -2.571305 | -0.834 | 0.1521 | 3.1506 |
| H | 0.818405  | 0.011311 | -3.089368 | 0.417  | 0.0000 | 0.0000 |
| H | 0.803348  | 1.507281 | -2.734042 | 0.417  | 0.0000 | 0.0000 |

### Geometry and Lennard-Jones Coulomb parameters of $[\text{Ru}^{\text{II}}(\text{OH})(\text{py})(\text{bpy})_2]^{\text{1+}}$

|    | X         | Y         | Z         | Q (e)  | E (kcal/mol) | S (Ang.) |
|----|-----------|-----------|-----------|--------|--------------|----------|
| C  | -3.292231 | -2.427922 | 0.129935  | -0.143 | 0.07         | 3.55     |
| C  | -2.150358 | -1.631563 | 0.278874  | -0.010 | 0.07         | 3.55     |
| N  | -1.535585 | -1.079177 | -0.805189 | 0.066  | 0.17         | 3.25     |
| C  | -2.032972 | -1.308646 | -2.036023 | 0.032  | 0.07         | 3.55     |
| C  | -3.163659 | -2.092254 | -2.247149 | -0.145 | 0.07         | 3.55     |
| C  | -3.806942 | -2.660801 | -1.143452 | 0.020  | 0.07         | 3.55     |
| H  | -3.529949 | -2.249354 | -3.260850 | 0.124  | 0.03         | 2.42     |
| H  | -1.484579 | -0.836483 | -2.849878 | 0.103  | 0.03         | 2.42     |
| C  | -1.929262 | -1.863119 | 2.791908  | -0.217 | 0.07         | 3.55     |
| C  | -1.502469 | -1.333637 | 1.567894  | 0.291  | 0.07         | 3.55     |
| N  | -0.415601 | -0.505294 | 1.489433  | -0.374 | 0.17         | 3.25     |
| C  | 0.255698  | -0.223973 | 2.628468  | 0.234  | 0.07         | 3.55     |
| C  | -0.115146 | -0.724555 | 3.871046  | -0.172 | 0.07         | 3.55     |
| C  | -1.234752 | -1.558194 | 3.959194  | 0.033  | 0.07         | 3.55     |
| H  | -2.797844 | -2.516984 | 2.831087  | 0.144  | 0.03         | 2.42     |
| Ru | 0.085104  | 0.144313  | -0.418512 | 0.331  | 0.40         | 1.80     |
| C  | 4.196048  | 1.230052  | 0.104366  | -0.167 | 0.07         | 3.55     |
| C  | 2.969951  | 0.583013  | -0.091841 | 0.072  | 0.07         | 3.55     |
| N  | 1.786536  | 1.258817  | 0.000989  | 0.127  | 0.17         | 3.25     |
| C  | 1.822674  | 2.579066  | 0.278767  | -0.016 | 0.07         | 3.55     |
| C  | 3.007258  | 3.277726  | 0.485966  | -0.107 | 0.07         | 3.55     |
| C  | 4.221110  | 2.590557  | 0.397898  | -0.003 | 0.07         | 3.55     |
| C  | 3.926888  | -1.725182 | -0.510172 | -0.192 | 0.07         | 3.55     |
| C  | 2.839325  | -0.850411 | -0.398327 | 0.166  | 0.07         | 3.55     |
| N  | 1.557184  | -1.289244 | -0.561738 | -0.129 | 0.17         | 3.25     |
| C  | 1.353321  | -2.594401 | -0.834436 | 0.047  | 0.07         | 3.55     |
| C  | 2.391120  | -3.512107 | -0.956881 | -0.124 | 0.07         | 3.55     |
| C  | 3.707000  | -3.070163 | -0.793417 | 0.026  | 0.07         | 3.55     |
| H  | 1.117141  | 0.431852  | 2.524261  | -0.016 | 0.03         | 2.42     |
| H  | -1.557166 | -1.966386 | 4.916577  | 0.098  | 0.03         | 2.42     |
| H  | 0.467540  | -0.458998 | 4.752251  | 0.129  | 0.03         | 2.42     |
| H  | -3.778051 | -2.862583 | 1.000652  | 0.127  | 0.03         | 2.42     |
| H  | -4.696035 | -3.277892 | -1.271210 | 0.100  | 0.03         | 2.42     |
| H  | 0.861789  | 3.083780  | 0.332338  | 0.084  | 0.03         | 2.42     |
| H  | 2.970173  | 4.343190  | 0.708667  | 0.116  | 0.03         | 2.42     |
| H  | 5.169580  | 3.104305  | 0.552019  | 0.108  | 0.03         | 2.42     |
| H  | 5.127596  | 0.674300  | 0.025075  | 0.139  | 0.03         | 2.42     |
| H  | 0.319097  | -2.903440 | -0.960225 | 0.082  | 0.03         | 2.42     |
| H  | 2.163036  | -4.553620 | -1.179400 | 0.115  | 0.03         | 2.42     |
| H  | 4.546021  | -3.759446 | -0.883899 | 0.102  | 0.03         | 2.42     |
| H  | 4.941502  | -1.357247 | -0.376324 | 0.138  | 0.03         | 2.42     |
| C  | -3.220616 | 3.838247  | -0.263974 | 0.028  | 0.07         | 3.55     |
| C  | -2.676703 | 3.335104  | 0.919774  | -0.139 | 0.07         | 3.55     |
| C  | -1.738805 | 2.307955  | 0.850992  | 0.069  | 0.07         | 3.55     |
| N  | -1.319983 | 1.770433  | -0.316118 | -0.093 | 0.17         | 3.25     |

|   |           |          |           |        |        |        |
|---|-----------|----------|-----------|--------|--------|--------|
| C | -1.848434 | 2.261154 | -1.459320 | 0.042  | 0.07   | 3.55   |
| C | -2.793165 | 3.285789 | -1.472557 | -0.149 | 0.07   | 3.55   |
| H | -3.958019 | 4.641311 | -0.243502 | 0.097  | 0.03   | 2.42   |
| H | -2.969850 | 3.727657 | 1.892861  | 0.112  | 0.03   | 2.42   |
| H | -1.302810 | 1.899524 | 1.759085  | 0.067  | 0.03   | 2.42   |
| H | -1.457660 | 1.809331 | -2.369969 | 0.124  | 0.03   | 2.42   |
| H | -3.182593 | 3.641232 | -2.426310 | 0.112  | 0.03   | 2.42   |
| O | 0.324644  | 0.564824 | -2.434806 | -0.895 | 0.1521 | 3.1506 |
| H | 1.072207  | 1.158418 | -2.577181 | 0.285  | 0.000  | 0.0000 |

Geometry and Lennard-Jones Coulomb parameters of  $[\text{Ru}^{\text{III}}(\text{H}_2\text{O})(\text{py})(\text{bpy})_2]^{3+}$

|    | X         | Y         | Z         | Q (e)  | E (kcal/mol) | S (Ang.) |
|----|-----------|-----------|-----------|--------|--------------|----------|
| C  | -3.255285 | -2.502354 | 0.062112  | -0.171 | 0.07         | 3.55     |
| C  | -2.131602 | -1.685629 | 0.204145  | 0.236  | 0.07         | 3.55     |
| N  | -1.654657 | -0.958325 | -0.846484 | -0.365 | 0.17         | 3.25     |
| C  | -2.294509 | -1.007323 | -2.028547 | 0.170  | 0.07         | 3.55     |
| C  | -3.418997 | -1.800671 | -2.231940 | -0.120 | 0.07         | 3.55     |
| C  | -3.902889 | -2.565971 | -1.170142 | 0.093  | 0.07         | 3.55     |
| H  | -3.898950 | -1.808546 | -3.208664 | 0.148  | 0.03         | 2.42     |
| H  | -1.902726 | -0.391031 | -2.833727 | 0.090  | 0.03         | 2.42     |
| C  | -1.692496 | -2.167948 | 2.652551  | -0.108 | 0.07         | 3.55     |
| C  | -1.392525 | -1.506232 | 1.461491  | 0.150  | 0.07         | 3.55     |
| N  | -0.364528 | -0.604390 | 1.408900  | -0.270 | 0.17         | 3.25     |
| C  | 0.361852  | -0.349223 | 2.517343  | 0.138  | 0.07         | 3.55     |
| C  | 0.097127  | -0.973385 | 3.729660  | -0.088 | 0.07         | 3.55     |
| C  | -0.943274 | -1.901446 | 3.797149  | 0.065  | 0.07         | 3.55     |
| H  | -2.505906 | -2.887764 | 2.689219  | 0.144  | 0.03         | 2.42     |
| Ru | 0.033672  | 0.194549  | -0.422721 | 1.300  | 0.40         | 2.00     |
| C  | 4.194471  | 1.089220  | 0.190084  | -0.146 | 0.07         | 3.55     |
| C  | 2.950412  | 0.507945  | -0.061939 | 0.191  | 0.07         | 3.55     |
| N  | 1.801758  | 1.234817  | 0.053904  | -0.325 | 0.17         | 3.25     |
| C  | 1.871402  | 2.526939  | 0.427067  | 0.202  | 0.07         | 3.55     |
| C  | 3.081666  | 3.158680  | 0.695526  | -0.116 | 0.07         | 3.55     |
| C  | 4.263072  | 2.428069  | 0.571383  | 0.070  | 0.07         | 3.55     |
| C  | 3.815801  | -1.805344 | -0.618675 | -0.160 | 0.07         | 3.55     |
| C  | 2.766602  | -0.900508 | -0.452753 | 0.232  | 0.07         | 3.55     |
| N  | 1.473539  | -1.295604 | -0.636596 | -0.449 | 0.17         | 3.25     |
| C  | 1.205456  | -2.572486 | -0.973055 | 0.203  | 0.07         | 3.55     |
| C  | 2.210440  | -3.515661 | -1.153408 | -0.133 | 0.07         | 3.55     |
| C  | 3.537596  | -3.124252 | -0.974276 | 0.112  | 0.07         | 3.55     |
| H  | 1.163006  | 0.376621  | 2.422941  | 0.066  | 0.03         | 2.42     |
| H  | -1.172167 | -2.414227 | 4.730524  | 0.128  | 0.03         | 2.42     |
| H  | 0.705176  | -0.730512 | 4.598841  | 0.146  | 0.03         | 2.42     |
| H  | -3.628528 | -3.079012 | 0.904483  | 0.163  | 0.03         | 2.42     |
| H  | -4.780088 | -3.199623 | -1.294411 | 0.120  | 0.03         | 2.42     |
| H  | 0.930346  | 3.061312  | 0.519046  | 0.050  | 0.03         | 2.42     |
| H  | 3.083810  | 4.204194  | 0.997643  | 0.144  | 0.03         | 2.42     |
| H  | 5.228789  | 2.890569  | 0.771636  | 0.126  | 0.03         | 2.42     |
| H  | 5.105345  | 0.504389  | 0.092870  | 0.152  | 0.03         | 2.42     |
| H  | 0.161691  | -2.839369 | -1.107067 | 0.067  | 0.03         | 2.42     |
| H  | 1.945670  | -4.534634 | -1.428849 | 0.150  | 0.03         | 2.42     |
| H  | 4.350795  | -3.837054 | -1.106041 | 0.117  | 0.03         | 2.42     |
| H  | 4.844609  | -1.487326 | -0.472611 | 0.154  | 0.03         | 2.42     |
| C  | -3.087111 | 3.989461  | 0.079615  | 0.112  | 0.07         | 3.55     |
| C  | -3.116186 | 2.927410  | 0.984507  | -0.158 | 0.07         | 3.55     |



|   |           |          |           |        |        |        |
|---|-----------|----------|-----------|--------|--------|--------|
| C | -2.225851 | 1.873371 | 0.821248  | 0.224  | 0.07   | 3.55   |
| N | -1.318820 | 1.835751 | -0.182601 | -0.459 | 0.17   | 3.25   |
| C | -1.292347 | 2.868888 | -1.059345 | 0.259  | 0.07   | 3.55   |
| C | -2.156927 | 3.952194 | -0.960490 | -0.168 | 0.07   | 3.55   |
| H | -3.775585 | 4.828124 | 0.182199  | 0.109  | 0.03   | 2.42   |
| H | -3.819233 | 2.903931 | 1.815317  | 0.143  | 0.03   | 2.42   |
| H | -2.233738 | 1.042601 | 1.518148  | 0.043  | 0.03   | 2.42   |
| H | -0.567736 | 2.811202 | -1.865070 | 0.075  | 0.03   | 2.42   |
| H | -2.091781 | 4.751287 | -1.697004 | 0.144  | 0.03   | 2.42   |
| O | 0.449875  | 0.833762 | -2.431118 | -0.834 | 0.1521 | 3.1506 |
| H | 0.208531  | 0.271426 | -3.182979 | 0.417  | 0.0000 | 0.0000 |
| H | 1.331668  | 1.184979 | -2.633486 | 0.417  | 0.0000 | 0.0000 |

Geometry and Lennard-Jones Coulomb parameters of  $[\text{Ru}^{\text{III}}(\text{OH})(\text{py})(\text{bpy})_2]^{2+}$

|    | X         | Y         | Z         | Q (e)  | E (kcal/mol) | S (Ang.) |
|----|-----------|-----------|-----------|--------|--------------|----------|
| C  | -3.342197 | -2.397488 | 0.131457  | -0.147 | 0.07         | 3.55     |
| C  | -2.196936 | -1.607068 | 0.264183  | 0.141  | 0.07         | 3.55     |
| N  | -1.654239 | -0.973519 | -0.813177 | -0.138 | 0.17         | 3.25     |
| C  | -2.231138 | -1.118449 | -2.020165 | 0.091  | 0.07         | 3.55     |
| C  | -3.372643 | -1.889867 | -2.215047 | -0.114 | 0.07         | 3.55     |
| C  | -3.939461 | -2.540366 | -1.118802 | 0.042  | 0.07         | 3.55     |
| H  | -3.798060 | -1.974583 | -3.213430 | 0.133  | 0.03         | 2.42     |
| H  | -1.751214 | -0.611741 | -2.852826 | 0.093  | 0.03         | 2.42     |
| C  | -1.888179 | -1.976329 | 2.751231  | -0.151 | 0.07         | 3.55     |
| C  | -1.497629 | -1.388390 | 1.544803  | 0.211  | 0.07         | 3.55     |
| N  | -0.423210 | -0.553051 | 1.487092  | -0.307 | 0.17         | 3.25     |
| C  | 0.265004  | -0.289069 | 2.613343  | 0.173  | 0.07         | 3.55     |
| C  | -0.080142 | -0.834409 | 3.845810  | -0.124 | 0.07         | 3.55     |
| C  | -1.173986 | -1.697772 | 3.914641  | 0.058  | 0.07         | 3.55     |
| H  | -2.742859 | -2.646894 | 2.786301  | 0.138  | 0.03         | 2.42     |
| Ru | 0.066285  | 0.184209  | -0.443483 | 0.723  | 0.40         | 1.80     |
| C  | 4.220380  | 0.984533  | 0.225388  | -0.138 | 0.07         | 3.55     |
| C  | 2.967449  | 0.428932  | -0.047778 | 0.101  | 0.07         | 3.55     |
| N  | 1.829819  | 1.166672  | 0.095015  | -0.041 | 0.17         | 3.25     |
| C  | 1.919331  | 2.439492  | 0.525539  | 0.102  | 0.07         | 3.55     |
| C  | 3.136492  | 3.044801  | 0.820097  | -0.115 | 0.07         | 3.55     |
| C  | 4.308957  | 2.305346  | 0.659354  | 0.035  | 0.07         | 3.55     |
| C  | 3.810035  | -1.874392 | -0.676984 | -0.196 | 0.07         | 3.55     |
| C  | 2.766080  | -0.967750 | -0.470370 | 0.236  | 0.07         | 3.55     |
| N  | 1.469231  | -1.345063 | -0.634586 | -0.248 | 0.17         | 3.25     |
| C  | 1.191002  | -2.609529 | -0.995601 | 0.156  | 0.07         | 3.55     |
| C  | 2.184690  | -3.560114 | -1.210416 | -0.152 | 0.07         | 3.55     |
| C  | 3.518880  | -3.183867 | -1.052155 | 0.072  | 0.07         | 3.55     |
| H  | 1.114528  | 0.381700  | 2.519838  | 0.033  | 0.03         | 2.42     |
| H  | -1.469865 | -2.150594 | 4.860341  | 0.110  | 0.03         | 2.42     |
| H  | 0.507574  | -0.584304 | 4.727277  | 0.134  | 0.03         | 2.42     |
| H  | -3.768077 | -2.898413 | 0.996911  | 0.142  | 0.03         | 2.42     |
| H  | -4.832706 | -3.153532 | -1.232362 | 0.115  | 0.03         | 2.42     |
| H  | 0.985603  | 2.982025  | 0.640676  | 0.075  | 0.03         | 2.42     |
| H  | 3.153260  | 4.076629  | 1.166171  | 0.129  | 0.03         | 2.42     |
| H  | 5.281424  | 2.746816  | 0.874785  | 0.120  | 0.03         | 2.42     |
| H  | 5.123086  | 0.390759  | 0.106686  | 0.139  | 0.03         | 2.42     |
| H  | 0.142431  | -2.863093 | -1.122132 | 0.069  | 0.03         | 2.42     |
| H  | 1.906317  | -4.571391 | -1.501710 | 0.135  | 0.03         | 2.42     |
| H  | 4.324330  | -3.898560 | -1.217786 | 0.111  | 0.03         | 2.42     |

|   |           |           |           |        |        |        |
|---|-----------|-----------|-----------|--------|--------|--------|
| H | 4.843480  | -1.562543 | -0.549628 | 0.151  | 0.03   | 2.42   |
| C | -2.911491 | 4.135201  | -0.252134 | 0.053  | 0.07   | 3.55   |
| C | -3.139778 | 3.040704  | 0.582619  | -0.141 | 0.07   | 3.55   |
| C | -2.282328 | 1.946760  | 0.516614  | 0.145  | 0.07   | 3.55   |
| N | -1.227982 | 1.892865  | -0.326208 | -0.301 | 0.17   | 3.25   |
| C | -1.006013 | 2.960931  | -1.127313 | 0.210  | 0.07   | 3.55   |
| C | -1.820292 | 4.088778  | -1.121063 | -0.154 | 0.07   | 3.55   |
| H | -3.567012 | 5.005596  | -0.224310 | 0.107  | 0.03   | 2.42   |
| H | -3.972171 | 3.022790  | 1.284481  | 0.126  | 0.03   | 2.42   |
| H | -2.442333 | 1.091237  | 1.164911  | 0.061  | 0.03   | 2.42   |
| H | -0.143738 | 2.903774  | -1.787630 | 0.037  | 0.03   | 2.42   |
| H | -1.590092 | 4.915192  | -1.791713 | 0.131  | 0.03   | 2.42   |
| O | 0.457317  | 0.546616  | -2.313170 | -0.764 | 0.1521 | 3.1506 |
| H | -0.270837 | 0.961939  | -2.796714 | 0.391  | 0.0000 | 0.0000 |

Geometry and Lennard-Jones Coulomb parameters of  $[\text{Ru}^{\text{IV}}(\text{O})(\text{py})(\text{bpy})_2]^{2+}$

|    | X         | Y         | Z         | Q (e)  | E (kcal/mol) | S (Ang.) |
|----|-----------|-----------|-----------|--------|--------------|----------|
| C  | -3.194061 | -2.547517 | 0.189697  | -0.148 | 0.07         | 3.55     |
| C  | -2.071924 | -1.720005 | 0.288314  | 0.144  | 0.07         | 3.55     |
| N  | -1.592354 | -1.070576 | -0.807077 | -0.203 | 0.17         | 3.25     |
| C  | -2.198767 | -1.229303 | -1.997599 | 0.096  | 0.07         | 3.55     |
| C  | -3.316699 | -2.042599 | -2.156566 | -0.121 | 0.07         | 3.55     |
| C  | -3.824728 | -2.710523 | -1.042295 | 0.066  | 0.07         | 3.55     |
| H  | -3.773252 | -2.141767 | -3.139758 | 0.130  | 0.03         | 2.42     |
| H  | -1.759098 | -0.685804 | -2.830986 | 0.118  | 0.03         | 2.42     |
| C  | -1.630511 | -2.144898 | 2.747132  | -0.151 | 0.07         | 3.55     |
| C  | -1.330466 | -1.493295 | 1.547392  | 0.205  | 0.07         | 3.55     |
| N  | -0.306017 | -0.602960 | 1.473216  | -0.360 | 0.17         | 3.25     |
| C  | 0.431845  | -0.351691 | 2.569536  | 0.200  | 0.07         | 3.55     |
| C  | 0.186023  | -0.965807 | 3.793808  | -0.116 | 0.07         | 3.55     |
| C  | -0.866018 | -1.878300 | 3.881872  | 0.058  | 0.07         | 3.55     |
| H  | -2.447798 | -2.859316 | 2.800651  | 0.141  | 0.03         | 2.42     |
| Ru | 0.052136  | 0.215899  | -0.534871 | 1.013  | 0.40         | 1.80     |
| C  | 4.152231  | 1.292992  | 0.129111  | -0.176 | 0.07         | 3.55     |
| C  | 2.938318  | 0.651033  | -0.125501 | 0.213  | 0.07         | 3.55     |
| N  | 1.763320  | 1.336781  | -0.060718 | -0.205 | 0.17         | 3.25     |
| C  | 1.770745  | 2.646187  | 0.243542  | 0.108  | 0.07         | 3.55     |
| C  | 2.947799  | 3.340061  | 0.507957  | -0.092 | 0.07         | 3.55     |
| C  | 4.158429  | 2.649796  | 0.450158  | 0.057  | 0.07         | 3.55     |
| C  | 3.920076  | -1.639330 | -0.582574 | -0.133 | 0.07         | 3.55     |
| C  | 2.825374  | -0.777334 | -0.483699 | 0.123  | 0.07         | 3.55     |
| N  | 1.563892  | -1.226662 | -0.726154 | -0.191 | 0.17         | 3.25     |
| C  | 1.368638  | -2.507680 | -1.079728 | 0.074  | 0.07         | 3.55     |
| C  | 2.419128  | -3.413014 | -1.199942 | -0.097 | 0.07         | 3.55     |
| C  | 3.716436  | -2.970567 | -0.942774 | 0.059  | 0.07         | 3.55     |
| H  | 1.239963  | 0.368044  | 2.459122  | 0.034  | 0.03         | 2.42     |
| H  | -1.090338 | -2.381628 | 4.821840  | 0.112  | 0.03         | 2.42     |
| H  | 0.810402  | -0.727851 | 4.653076  | 0.129  | 0.03         | 2.42     |
| H  | -3.579371 | -3.059615 | 1.067560  | 0.138  | 0.03         | 2.42     |
| H  | -4.700938 | -3.352379 | -1.127023 | 0.109  | 0.03         | 2.42     |
| H  | 0.806088  | 3.144422  | 0.273565  | 0.082  | 0.03         | 2.42     |
| H  | 2.904137  | 4.400034  | 0.751084  | 0.124  | 0.03         | 2.42     |
| H  | 5.100578  | 3.159258  | 0.649736  | 0.115  | 0.03         | 2.42     |
| H  | 5.088810  | 0.744105  | 0.074658  | 0.154  | 0.03         | 2.42     |
| H  | 0.343622  | -2.810969 | -1.273655 | 0.093  | 0.03         | 2.42     |

|   |           |           |           |        |      |      |
|---|-----------|-----------|-----------|--------|------|------|
| H | 2.211919  | -4.441421 | -1.490044 | 0.129  | 0.03 | 2.42 |
| H | 4.563889  | -3.650546 | -1.023144 | 0.111  | 0.03 | 2.42 |
| H | 4.925548  | -1.278859 | -0.382048 | 0.136  | 0.03 | 2.42 |
| C | -3.285445 | 3.839164  | 0.038791  | 0.071  | 0.07 | 3.55 |
| C | -2.816919 | 3.137724  | 1.150344  | -0.139 | 0.07 | 3.55 |
| C | -1.875954 | 2.129164  | 0.968576  | 0.142  | 0.07 | 3.55 |
| N | -1.389695 | 1.797354  | -0.248387 | -0.281 | 0.17 | 3.25 |
| C | -1.844764 | 2.478954  | -1.324021 | 0.119  | 0.07 | 3.55 |
| C | -2.785592 | 3.498495  | -1.218713 | -0.133 | 0.07 | 3.55 |
| H | -4.022744 | 4.634192  | 0.150739  | 0.099  | 0.03 | 2.42 |
| H | -3.169220 | 3.360958  | 2.156201  | 0.123  | 0.03 | 2.42 |
| H | -1.495327 | 1.574708  | 1.820633  | 0.065  | 0.03 | 2.42 |
| H | -1.425663 | 2.189100  | -2.284242 | 0.110  | 0.03 | 2.42 |
| H | -3.113972 | 4.013551  | -2.120251 | 0.120  | 0.03 | 2.42 |
| O | 0.156952  | 0.629306  | -2.250805 | -0.570 | 0.21 | 2.96 |

### Geometry and Lennard-Jones Coulomb parameters of H<sub>2</sub>O

|   | X          | Y           | Z           | Q(e)   | E(kcal/mol) | S(Ang) |
|---|------------|-------------|-------------|--------|-------------|--------|
| O | 0.62050961 | -1.46679902 | -2.34634898 | -0.834 | 0.1521      | 3.1506 |
| H | 0.79418961 | -2.38063902 | -2.07210898 | 0.417  | 0.0000      | 0.0000 |
| H | 1.21937961 | -1.20438902 | -3.06320898 | 0.417  | 0.0000      | 0.0000 |

## References

- [1] Harrowfield JM, Sobolev AN. The crystal structure of tris (2, 2'-bipyridine) ruthenium (II) perchlorate. Australian Journal of Chemistry. 1994;47(4):763–767.
